1 **Running Title: Role of FERONIA in Root Hair Tip-Growth**

2 **Functional Characterization of *fer-ts*, a Temperature-Sensitive FERONIA Mutant**

3 **Allele That Alters Root Hair Growth**

4

5 Daewon Kim<sup>1,3</sup>, Fangwei Gu<sup>3</sup>, Sung Jin Park<sup>3</sup>, Jonathon Combs<sup>3</sup>, Alexander Adams<sup>2</sup>, Heather B.

6 Mayes<sup>2</sup>, Jeong Dong Bahk<sup>1</sup> and Erik Nielsen<sup>3</sup>

7 *<sup>1</sup>Division of Applied Life Sciences (BK21plus), Graduate School of Gyeongsang*

8 *National University, Jinju 660-701, Republic of Korea*

9 *<sup>2</sup>Department of Chemical Engineering, University of Michigan, Ann Arbor, MI 48109,*

10 *USA.*

11 *<sup>3</sup>Department of Molecular, Cellular, and Developmental Biology, University of*

12 *Michigan, Ann Arbor, Michigan 48109*

13

14 *Corresponding author: E. Nielsen; e-mail: nielsene@umich.edu*

15

16

17

18

19

20

21

22

23

24

25

26

27

28 E.N. conceived the original screening and research plans; J-D.B. and E.N. supervised  
29 the experiments; D.K., F.G., S-J.P., and J.C. performed the in planta experiments and  
30 microscopy, and A.A. performed structural modeling and was supervised by H.B.M.  
31 D.K. wrote the article with contributions of all the authors; E.N. supervised and  
32 completed the writing, and agrees to serve as the author responsible for contact and  
33 ensures communication.

34 **ABSTRACT**

35 In plants, root hairs undergo a highly-polarized form of cell expansion called tip-growth,  
36 in which cell expansion is restricted to the root hair apex. In order to characterize  
37 cellular components playing a role in this specialized form of cellular expansion we  
38 screened for conditional temperature sensitive (*ts*) mutants by EMS mutagenesis. Here  
39 we describe one of these mutants, *fer-ts* (*feronia-temperature sensitive*). Mutant *fer-ts*  
40 seedlings grew normally at permissive temperatures (20°C), but failed to form root hairs  
41 at non-permissive temperatures (30°C). Map based-cloning and whole genome  
42 sequencing revealed that *fer-ts* resulted from a G41S substitution in the extracellular  
43 domain of *FERONIA* (*FER*). A functional fluorescent fusion of *FER* containing the *fer-*  
44 *ts* mutation maintained a plasma membrane localization at both permissive and non-  
45 permissive temperatures, but that the *fer-ts* allele was subject to enhanced protein  
46 turnover at elevated temperatures. Mutant *fer-ts* seedlings were resistant to added  
47 RALF1 peptide at non-permissive temperatures, supporting a role for *FER* in perception  
48 of this peptide hormone. Additionally, at non-permissive temperatures *fer-ts* seedlings  
49 displayed altered ROS accumulation upon auxin treatment and phenocopied constitutive  
50 *fer* mutant responses to a variety of plant hormone treatments. Molecular modeling and  
51 sequence comparison with other CrRLK1L receptor family members revealed that the  
52 mutated glycine in *fer-ts* is highly conserved, but significantly removed from recently  
53 characterized RALF23 and LORELI-LIKE-GLYCOPROTEIN (LLG2) binding  
54 domains, perhaps suggesting that *fer-ts* phenotypes may not be directly due to loss of  
55 binding to RALF1 peptides.

56  
57 Key words: FERONIA, root hair, tip growth, CrRLK1L receptor kinase, RALF.  
58

## 59 INTRODUCTION

60 In higher plants, root hairs are cellular protuberances resulting from the  
61 polarized outgrowth of specialized root epidermal cells, known as trichoblasts (Gilroy  
62 and Jones, 2000). Development of root hair can be divided into three phases: cell  
63 specification, initiation of bulge formation, and polarized tip growth (Cho and Cosgrove,  
64 2002).

65 Polarized tip growth is precisely modulated due to the highly localized  
66 exocytosis of Golgi-derived vesicles and the deposition of cell wall material at a  
67 restricted area of the root hair tip region, and a tip-concentrated cytoplasmic calcium ion  
68 ( $\text{Ca}^{2+}$ ) gradient ensures correct targeting of this polarized membrane trafficking  
69 (Hepler et al., 2001; Smith et al., 2005; Cole and Fowler, 2006). This calcium ion  
70 gradient is established by localized generation of reactive oxygen species (ROS) by  
71 *ROOT HAIR DEFECTIVE2 (RHD2)* which encodes an NADPH oxidase in *A. thaliana*  
72 (Foreman et al., 2003). RHO OF PLANTS (ROP) small GTPases mediated signal  
73 transduction is involved in specifying the root hair initiation site, and future root hair  
74 elongation by stimulating *RHD2* activity at the growing root hairs tip apex (Molendijk  
75 et al., 2001; Jones et al., 2002; Carol and Dolan, 2006). Recently, a number of receptor-  
76 like kinases (RLKs) have been identified that are involved in cellular growth regulatory  
77 mechanisms, especially in cell elongation associated with root hair tip growth in higher  
78 plants (Shiu and Bleecker, 2001; Lehti-Shiu et al., 2009; Lindner et al., 2012).

79 The plant RLK family has more than 600 members in *Arabidopsis*, divided into  
80 44 subfamilies depending on their N-terminal domains (Shiu and Bleecker, 2001; Greeff  
81 et al., 2012). While RLKs have been implicated in many biologically important  
82 processes, a number of subfamilies within this superfamily have been implicated in

83 monitoring of cell wall integrity and cell wall properties (Feng et al., 1995). In  
84 particular, CrRLK1L subfamily proteins, which includes *FER* (Huck et al., 2003),  
85 *EREBUS (ERE)* (Haruta et al., 2014), *THESEUS1 (THE1)* (Hematy et al., 2007),  
86 *ANXURI/2* (Miyazaki et al., 2009), have been implicated in cell wall sensing  
87 associated with a variety of cellular events such as female fertility, cell elongation, root-  
88 hair development, mechanosensing, and responses to hormones and pathogens  
89 (Boisson-Dernier et al., 2009; Cheung and Wu, 2011; Lindner et al., 2012).

90 The CrRLK1L subfamily is named after the first member functionally  
91 characterized in *Catharanthus roseus* cell cultures (Schulze-Muth et al., 1996), and  
92 *Arabidopsis*, contains 17 CrRLK1L subfamily members (Hematy and Hofte, 2008). The  
93 majority of CrRLK1L receptor-like kinase proteins are predicted serine/threonine  
94 kinases with a single transmembrane between an N-terminal extracellular domain and a  
95 C-terminal cytoplasmic kinase domain (Cheung and Wu, 2011). The CrRLK1L proteins  
96 have an extracellular domain with two domains showing limited homology to the  
97 carbohydrate-binding domain of animal malectin proteins (Schallus et al., 2008).

98 In the CrRLK1L subfamily, *THE1* was discovered in a screen for suppressors  
99 that partially restored the dark-grown hypocotyl growth defect of *procuste1-1(prc1-1)*,  
100 which is defective in the cellulose synthase catalytic subunit CESA6 (Hematy et al.,  
101 2007). *THE1* is localized to the plasma membrane (PM) of elongating cells and in  
102 vascular tissues. *THE1* loss- and gain-of-function plants do not appear to display  
103 significant growth defects in wild-type backgrounds, but these mutants altered the  
104 growth and ectopic lignification in a number of plants with defects in cell wall integrity  
105 (Hematy et al., 2007). Another member of CrRLK1L subfamily, *HERCULES1*  
106 (*HERK1*), was identified as functionally redundant with *THE1* in modulating cell

107 elongation (Guo et al., 2009). While mutant *herk1* plants displayed normal growth, *the1*  
108 *herk1* double mutants were severely stunted (Guo et al., 2009). In addition, HERK1 has  
109 an autophosphorylation activity and is highly phosphorylated in the kinase domain *in*  
110 *planta* (Guo et al., 2009). In addition, *ANXURI* and *ANXUR2* (*ANXI* and *ANX2*), are  
111 exclusively expressed in the male gametophyte (Boisson-Dernier et al., 2009). *ANXI*  
112 and *ANX2* are responsible for maintaining pollen tube wall integrity during migration  
113 through floral tissues, and their deactivation is thought to allow the pollen to burst  
114 during fertilization (Boisson-Dernier et al., 2009). These proteins are localized to  
115 growing pollen tube tips, and appeared to be associated with vesicles involved in  
116 polarized membrane trafficking during tip growth (Boisson-Dernier et al., 2009).

117         Similar to *ANXI* and *ANX2*, and *FER*, which is allelic to *SIRÈNE* (*SRN*), was  
118 initially identified in the regulation of female control of fertility (Huck et al., 2003).  
119 Interestingly, *FER* is highly expressed in the synergid cells of the female gametophyte  
120 and in a variety of vegetative tissues, but not in the male gametophyte (Escobar-  
121 Restrepo et al., 2007; Guo et al., 2009). In the female gametophyte, *FER* is involved in  
122 sensing pollen tube arrival and promoting its rupture, (Huck et al., 2003; Rotman et al.,  
123 2003), in the initiation of programmed cell death of one of two synergid cells during  
124 this double fertilization event (Ngo et al., 2014), and in the inhibition of polyspermy  
125 through regulation of demethylesterified pectin accumulation in the filiform apparatus  
126 of the ovule (Duan et al., 2020). In addition to important roles during fertilization, *FER*  
127 has also been shown to regulate aspects of root hair elongation (Duan et al., 2010;  
128 Huang et al., 2013), calcium signaling during mechanical stimulation of roots (Shih et  
129 al., 2014), and cell wall responses to both abiotic and biotic stress (Huck et al., 2003;  
130 Rotman et al., 2003; Lindner et al., 2012; Duan et al., 2014; Ngo et al., 2014; Shih et al.,

131 2014; Li et al., 2016). *FER* was identified as a ROP guanidine exchange factor 1  
132 (ROPGEF1) interacting partner by yeast two-hybrid screening for root hair tip-growth  
133 in *Arabidopsis* (Duan et al., 2010). More recently, *FER*, and other members of the  
134 CrRLK1L receptor families have been proposed to bind to secreted RALF (rapid  
135 alkalization factor) peptide ligands (Haruta et al., 2014), with RALF1, binding the  
136 *FER* extracellular domain to suppress cell elongation of the primary root (Haruta et al.,  
137 2014), and RALF23 binding *FER* during plant immune responses (Xiao et al., 2019).

138         Although several mutants of *FER* have been previously described, we have  
139 identified a new temperature-sensitive mutation (*fer-ts*) in a highly conserved glycine  
140 residue (G41S) present in the extracellular domain of the *FER* receptor kinase, as well  
141 as other members of the CrRLK1L receptor-like kinase family and mammalian malectin  
142 sequences. The *fer-ts* mutant exhibited rapid and dramatically decreased root hair tip-  
143 growth upon transferal from permissive temperature to non-permissive growth  
144 temperature. Additionally, *fer-ts* mutants were partially insensitive to RALF1 peptide  
145 induced root elongation inhibition at non-permissive temperatures, showed altered root  
146 growth characteristics compared to wild-type plants when exposed to auxin, and  
147 displayed reduces ROS accumulation. Cessation of root hair tip growth occurred within  
148 five minutes of transfer to non-permissive temperatures, and observation that a  
149 fluorescently-tagged version of the temperature-sensitive FER(G41S)-EYFP mutant  
150 was still correctly targeted to the plasma membrane at these early time points, suggests  
151 that the primary defect of this mutant is due to failure to properly transmit extracellular  
152 signals at non-permissive temperatures.

153

154

155

156

## 157 **RESULTS**

### 158 **Isolation of a temperature-sensitive mutant that inhibits root hair tip growth**

159 The regulatory GTPase, RabA4b, participates in membrane trafficking associated with  
160 the polarized secretion of cell wall components in plant cells. In addition, loss of tip  
161 localization of EYFP-RabA4b is highly correlated with inhibition of root hair tip growth  
162 (Preuss et al., 2004). In order to understand molecular mechanisms that control root hair  
163 tip growth, EMS-mutagenized seeds of a stable transgenic Arabidopsis line expressing  
164 EYFP-RabA4b were screened for seedlings with wild-type root hairs at permissive  
165 temperatures (20°C), but which displayed impaired root hair growth when grown at  
166 non-permissive temperatures (30°C). The progeny of approximately 6,000 EMS-  
167 mutagenized seeds were screened. From the screening, four temperature-sensitive (ts-)  
168 root hair growth defect mutants were isolated, which we initially termed Loss-of-Tip-  
169 Localization mutants (*ltl1* to *ltl4*). Among these *ltl* ts mutants, *ltl2*, (subsequently  
170 referred to as *fer-ts*) root hair growth characteristics were examined under permissive  
171 and non-permissive temperature conditions. In permissive growth conditions (20°C),  
172 *fer-ts* root hairs displayed normal growth, however, both root hair growth and apical  
173 accumulation of EYFP-RabA4b of *fer-ts* root hairs were dramatically inhibited at 30°C  
174 (Figure 1a and 1d).

175 To quantify root hair elongation in *fer-ts* under permissive and non-permissive  
176 temperature conditions, both root hair lengths and root hair density were measured. No  
177 significant differences were found between wild-type and *fer-ts* either in mature root  
178 hair length, or in the number of root hairs per unit root length when plants were grown  
179 at 20°C. However, both length of root hairs and root hair density were greatly reduced  
180 in *fer-ts* in plants grown at 30°C (Figure 1c and 1d). Primary root length and root



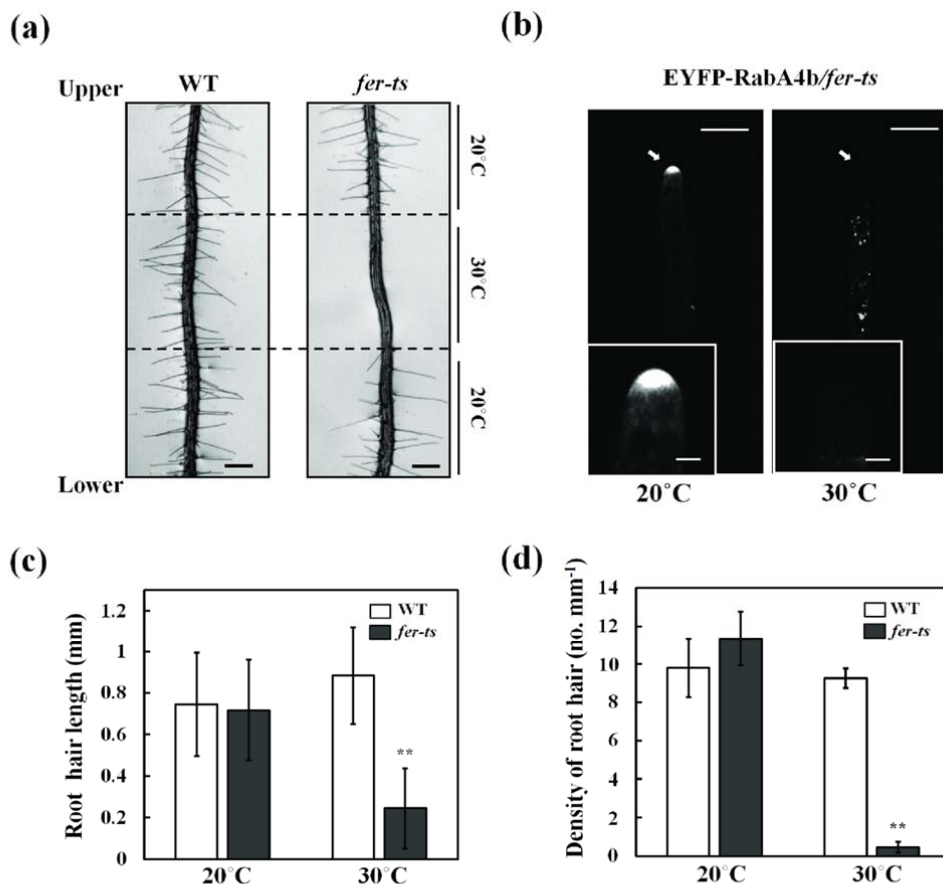

**Figure 1. Isolation of a temperature-sensitive root hair growth defect mutant.**

(a) Seven day-old seedling plants were grown vertically in 1/4 MS media under 20°C and transferred to 30°C for 6 h, followed by 24 h recovery at 20°C. Bright field images were collected with a Nikon Eclipse E600 wide-field microscope with a 20x Plan Apo DIC (n.a. 0.75) lens. Dashed lines indicate root tip positions when seedling plants were transferred to 30°C condition for 6 hours, and again when they were transferred back to 20°C. Scale bars = 200  $\mu\text{m}$ . (b) Localization of EYFP-RabA4b protein in growing root-hair cells of *fer-ts* mutant at 20°C and 30°C. Medial root hair sections were collected using spinning-disk confocal microscopy from growing root-hair cells of seven-day-old seedlings stably expressing EYFP-RabA4b in the *fer-ts* mutant in 20°C (left) or 30°C (right) using a Zeiss 40x Plan-Apochromat (n.a. 1.3) lens and appropriate EYFP fluorescence filter sets. Scale bars = 10  $\mu\text{m}$ . Insets, magnified images to show details of EYFP-RabA4b subcellular localization in root-hair tips. Scale bars = 2  $\mu\text{m}$ . (c) Quantification of root hair length in WT and *fer-ts* mutants under 20°C (wild-type (n=392), *fer-ts* (n=454)) and 30°C (wild-type (n=185), *fer-ts* (n=23)) conditions. (d) Calculation of root hair densities in WT and *fer-ts* mutants at 20°C (wild-type (n=392), *fer-ts* (n=454)) and 30°C (wild-type (n=185), *fer-ts* (n=23)) in fully expanded primary roots of seven-day old plants. In each case, root hair lengths and densities were measured from n=20 individual seedlings. Error bars represent SD. \*\*p<0.001 by Student's t-test.

181 growth rates of *fer-ts* seedlings were only slightly reduced compared with those of wild-  
 182 type at 30°C (See Supplemental Figure S1). These results indicated that, at least in early  
 183 stages of seedling growth and development *fer-ts* temperature sensitive defects are  
 184 largely specific to root hair elongation in non-permissive temperature conditions.

185 In order to characterize effects of the *fer-ts* mutation on root hair growth

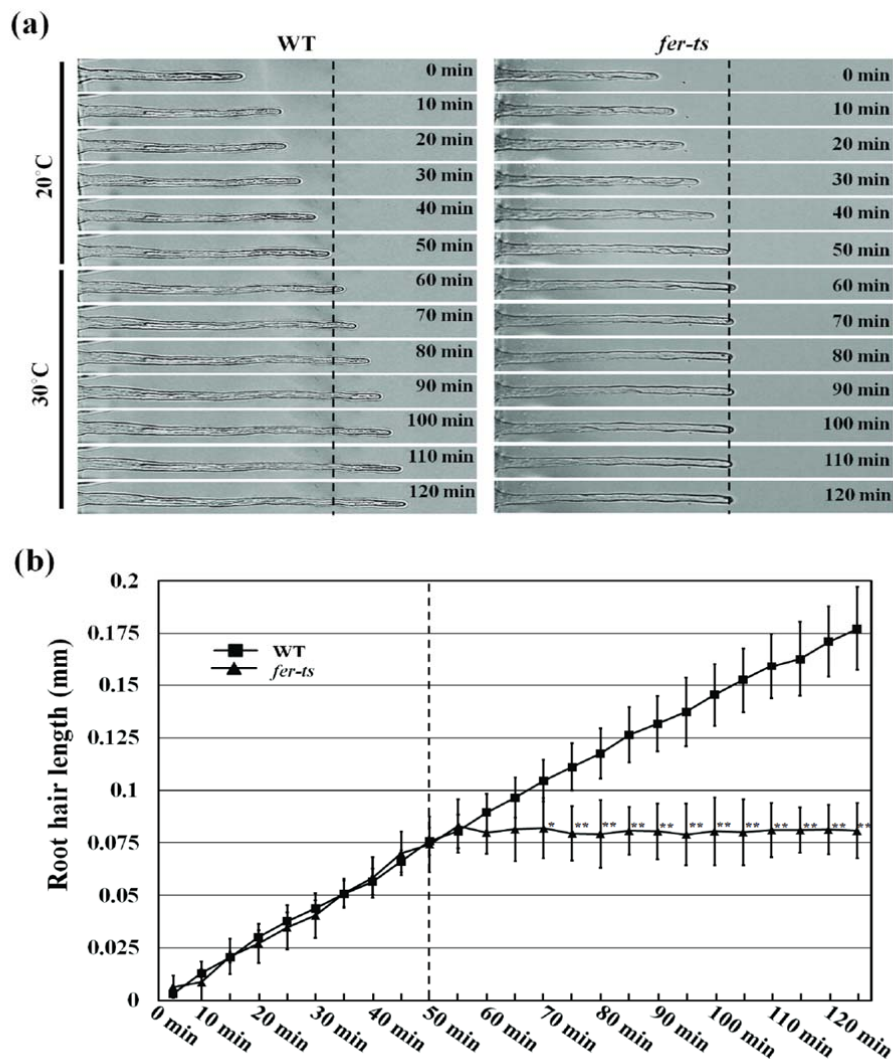

**Figure 2. Root hair growth dynamics in WT and *fer-ts* seedlings.**

(a) Root hair tip-growth in WT and *fer-ts* mutant plants under permissive (20°C) and non-permissive (30°C) temperatures by time-lapse microscopy. Bright field images of growing root hairs of WT and *fer-ts* mutant plants were collected every minute by time-lapse microscopy using a Zeiss 40x Plan-Apochromat (1.3 NA) lens. Representative images of WT and *fer-ts* mutant root hair elongation are presented at 10 min intervals. (b) Quantitative analysis of WT (n=4) and *fer-ts* mutant (n=4) root hair lengths upon transition to 30°C. WT (black squares) and *fer-ts* (black triangles) mutant root hair elongation were measured every five minutes and root hair lengths were determined using the measure function in Image J (1.44 version). The dashed line indicates transition from 20°C to 30°C. Error bars represent SD. \*p<0.05, \*\*p<0.01 by Student's t-test.

186 dynamics, elongating root hairs were visualized by time-lapse microscopy for two hours.

187 Seven day-old *fer-ts* seedlings were placed in a temperature-controlled plant growth

188 chamber at 20°C for 50 min and then the temperature of the chamber was rapidly

189 transitioned to 30°C (Figure 2). While root hair growth was unaffected by temperature

190 transition in wild-type plants, transition from permissive to non-permissive  
191 temperatures resulted in rapid cessation of tip-growth in the *fer-ts* mutant (Figure 2 and  
192 Movie S1). The rapid kinetics of inhibition of *fer-ts* root hair growth within 5-10  
193 minutes would be consistent with rapid inactivation of *fer-ts* protein function at the  
194 plasma membrane.

195         The polarized cell expansion that occurs in root hairs is driven by specific  
196 targeting of newly-synthesized cell wall cargo to the growing apex of the root hair cell  
197 (Nielsen, 2008; Cheung and Wu, 2011). Delivery of this cell wall cargo, which occurs  
198 by polarized membrane trafficking, is associated with the tip-localized accumulation of  
199 membrane compartments labeled by the small regulatory GTPase, RabA4b (Preuss et al.,  
200 2004). EYFP-RabA4b was detected in the apical region of growing *fer-ts* root hairs at  
201 20°C, but tip localization of EYFP-RabA4b was rapidly lost upon transition to 30°C  
202 (Figure 3). Because the apical accumulation of EYFP-RabA4b compartments has been  
203 tightly linked to polarized expansion in root hair cells (Preuss et al., 2004; Preuss et al.,  
204 2006; Thole et al., 2008), we examined how these compartments were affected by the  
205 transition from permissive to non-permissive growth temperatures (Figure 3a). EYFP-  
206 RabA4b accumulation was examined in *fer-ts* plants in a temperature-controlled  
207 chamber at 20°C for 14 min, and then the chamber was rapidly transitioned to 30°C  
208 (Figure 3b). Images of growing root hairs were collected at one minute intervals by  
209 time-lapse confocal microscopy, and tip-localized EYFP signal was quantified. While  
210 tip-localized EYFP-RabA4b signal was unaffected by transition from 20°C to 30°C in  
211 wild-type root hairs (See supplemental Figure S2), tip-localized EYFP-RabA4b was  
212 significantly reduced within one minute of the transition from 20°C to 30°C (Figure 3b  
213 and 3c). Significantly, this reduction coincided with both elevated chamber temperature

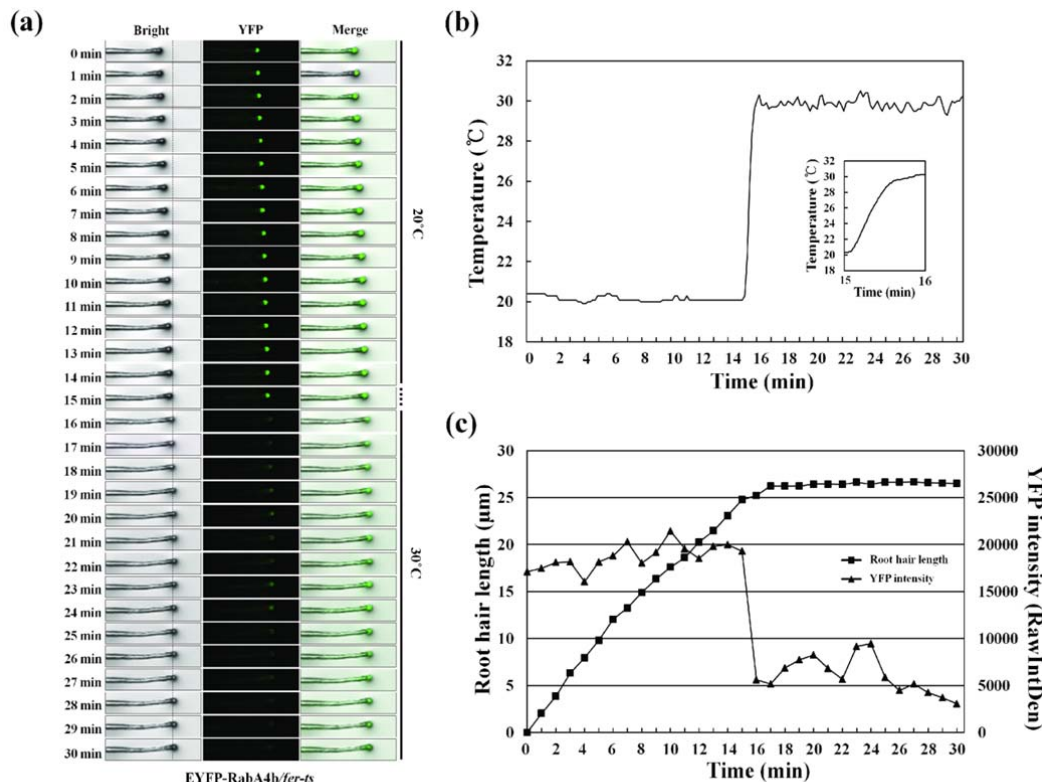

**Figure 3. Temperature-sensitive subcellular dynamics of EYFP-RabA4b labeled compartments in growing root hairs in *fer-ts* mutants.**

(a) Localization of EYFP-RabA4b protein in growing root-hair cells of *fer-ts* mutant at permissive (20°C) or non-permissive (30°C) temperature conditions. Growing *fer-ts* root hairs were imaged at one minute intervals for 30 min at 20°C at which the growth chamber temperature was raised to 30°C. For each time point, both bright field (Bright) and fluorescence (YFP) images were collected sequentially, and tip-localized EYFP-RabA4b compartments were monitored by spinning-disk fluorescence confocal microscopy using a Zeiss 40x Plan-Apochromat (1.3 NA) lens with appropriate EYFP fluorescence filter sets. The dashed line indicates the temperature transition from 20°C to 30°C. Merge indicates overlapped images of bright and EYFP fluorescent signals. (b) Monitoring of chamber temperatures of *fer-ts* mutant. Insert, transition of the growth chamber temperature from 20°C up to 30°C were measured every 1 min by dry air thermostat situated in close proximity (~2 mm) from the growing root hair. (c) Quantification of root hair elongation and EYFP-RabA4b root hair tip localization. Root hair length and EYFP-RabA4b fluorescence were quantified by Image J (1.44 version) program every 1 min.

214 and cessation of tip-growth (Figure 3c).

215

## 216 Map-based cloning and full-genome sequencing of the *fer-ts* locus

217 To identify the mutant locus responsible for the rapid, temperature-sensitive loss of root  
 218 hair elongation and tip-localized EYFP-RabA4b, map-based cloning and full-genome  
 219 sequencing was performed. F<sub>2</sub> mapping populations were obtained by reciprocal crosses  
 220 of back-crossed mutants (Col-0) with *Ler* wild-type plants (Bell and Ecker, 1994).

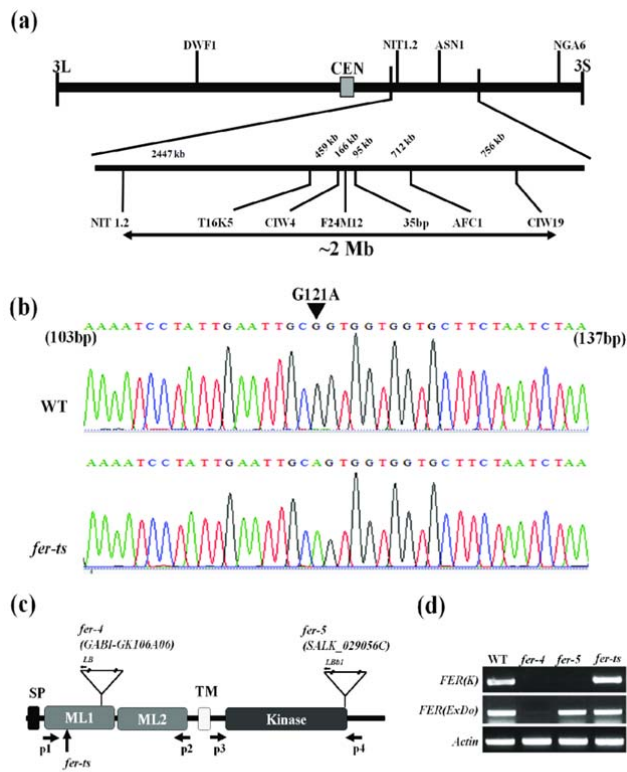

**Figure 4. Map-based cloning of *fer-ts*.**

(a) A linear diagram of the Arabidopsis third chromosome is shown, with a magnified F24M12 marker region displayed below. The centromere is indicated with filled-rectangle. Low-resolution map-based cloning resulted in identification of the *fer-ts* locus within an approximately 2 Mb region of chromosome III bounded by markers NIT1.2 and CIW19 (Double headed arrow). (b) SNPs specific to the *ts*-mutant within this region were identified using whole genomic resequencing, followed by targeted resequencing of genomic DNA sequencing of *fer-ts* and wild-type parental lines. A single G-to-A substitution was found in FERONIA (At3g51550). The arrowhead indicates G121A substituted mutation in the FERONIA gene locus. (c) Schematic diagram of FERONIA protein domains and mutation regions, composed of an N-terminal extracellular domain (tandem repeat malectin-like domains; ML1 and ML2), TM (transmembrane) domain in the middle region and a C-terminal kinase domain (serine/threonine kinase), end of N-terminus has signal peptide (SP) sequence for plasma-membrane trafficking. The *fer-4* and *fer-5* mutants displayed that T-DNA was inserted in malectin-like domain 1 and kinase domain, respectively. (d) RT-PCR analysis of T-DNA inserted mutants and EMS mutants. FER (K) and FER (ExDo) was amplified using pair of P1 and P2 primers and P3 and P4 primers, respectively. Actin was used as a loading control.

221 Segregating F<sub>2</sub> populations were used for the subsequent map-based cloning. The  
 222 temperature-sensitive mutant lesion was initially located on chromosome 3 between the  
 223 SSSP markers *NIT1.2* and *NGA6* (Figure 4a). Low-resolution mapping narrowed the  
 224 location of the mutant locus to an approximately 2 Mb region of chromosome 3. We  
 225 then performed whole-genome sequencing, and determined that the *fer-ts* mutant locus  
 226 within this 2 Mb region of chromosome 3 was due to a G121A nucleotide replacement  
 227 resulting in a G41S substitution mutation within the extracellular domain of the

228 previously characterized FER receptor-like kinase (Figure 4b and 4c). In order to  
229 eliminate the possibility that the G→A substitution that gave rise to the *fer-ts* G41S  
230 mutation influenced accumulation of *FER* mRNA at the transcriptional level, we  
231 performed RT-PCR analysis. *FERONIA* transcript levels were unchanged from those in  
232 wild-type plants (Figure 4d).

233

234 ***fer-ts* phenotypes were confirmed by reciprocal crossing with FERONIA mutants**  
235 **and complementation assays**

236 To confirm that the temperature sensitive root hair defects and loss of tip-localized  
237 EYFP-RabA4b were causally linked to the G41S mutation in the *FER* locus, *fer-ts*  
238 mutant plants were reciprocally crossed with two previously characterized *FER* mutants,  
239 *fer-4* and *fer-5* (Duan et al., 2010). In previous reports, *fer-4* was shown to fully abolish  
240 *FER* protein accumulation, while *fer-5* was shown to accumulate a truncated *FER*  
241 protein missing a functional cytosolic protein kinase domain, although both *fer-4* and  
242 *fer-5* mutants displayed constitutive root hair growth defects (Duan et al., 2010). The F1  
243 generation of *fer-ts* crossed to wild-type plants displayed normal root hair growth in  
244 both permissive and non-permissive temperature conditions. However, F1 progeny of  
245 either *fer-ts* (paternal line) crossed with *fer-4* and *fer-5* mutants (maternal lines; Figure  
246 5a), or *fer-ts* (maternal line) crossed with *fer-4* and *fer-5* mutants (paternal line;  
247 Supplemental Figure S3a) displayed ts-phenotypes at non-permissive temperatures,  
248 respectively. The F1 generations of reciprocally crossed plants were confirmed by  
249 genomic DNA PCR analysis with primers that discriminated between the *fer-ts* (or  
250 wild-type) *FER* loci and *fer-4* and *fer-5* T-DNA insertion mutant loci (Figure 5b-c, and  
251 Supplemental Figure S3b).

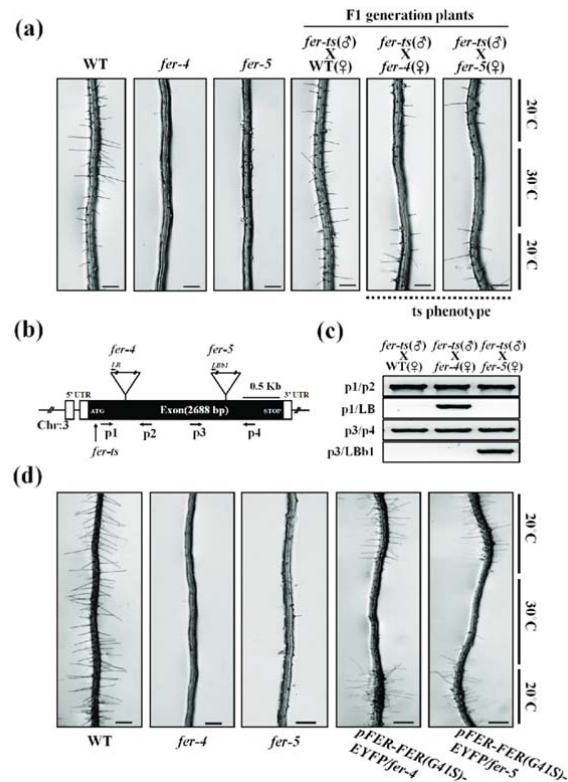

**Figure 5. The *fer-ts* mutant confers *ts*-root hair growth defects when crossed with *fer-4* and *fer-5* mutants.**

(a) Wild-type (WT), *fer-4*, *fer-5*, and F1 progeny from crosses (paternal = *fer-ts*, maternal = *fer-4* or *fer-5*) of *fer-ts/fer-4* and *fer-ts/fer-5* were grown vertically for seven days at 20°C, transferred to 30°C for 6 h, and then grown for an additional 24 h at 20°C. Bright field images were collected with a Nikon Eclipse E600 wide-field microscope with a 20x Plan Apo DIC (0.75 NA) lens. Both *fer-ts/fer-4* and *fer-ts/fer-5* progeny clearly demonstrated a *ts*-dependent root hair phenotype. Scale bars = 200 μm. (b) Schematic diagram of the *FERONIA* gene structure. Open and filled boxes indicate untranslated regions (UTRs) and exon regions, respectively. The locations of T-DNA insertion mutants (*fer-4* and *fer-5*) and *fer-ts* are indicated by triangles and arrows, respectively. (c) Genotyping of crossed F1 plants. Genomic DNA was extracted from F1 generation plants and subjected PCR to confirm presence of the *fer-4* and *fer-5* genotypes (d) Both *fer-4* and *fer-5* display temperature-dependent root hair phenotypes when transformed with a fluorescently-tagged FER construct containing the *fer-ts* mutation (pFER-FER(G41S)-EYFP). Seven-day old seedlings were grown vertically for seven days at 20°C, transferred to 30°C for 6 h, and then grown for an additional 24 h at 20°C. Bright field images were collected with a Nikon Eclipse E600 wide-field microscope with a 20x Plan Apo DIC (0.75 NA) lens. Presence of the transgenic pFER-FER(G41S)-EYFP construct clearly demonstrated a *ts*-dependent root hair phenotype. Scale bars = 200 μm.

252 To verify that the FER G41S mutation specifically conferred the temperature-sensitive  
 253 root hair phenotype, a fluorescently tagged FER-EYFP containing the G41S mutation,  
 254 FER(G41S), driven by endogenous *FER* promoter sequences, was transformed into *fer*-  
 255 4 and *fer-5* mutant plants. Transgenic *fer-4* and *fer-5* plants, expressing mutant  
 256 FER(G41S)-EYFP proteins rescued root hair growth defects in these two *fer* mutant  
 257 backgrounds in a temperature-sensitive manner (Figure 5d). Further, a wild-type

258 fluorescently-tagged FER-EYFP, driven by endogenous FER promoter sequences, was  
259 able to fully rescue *fer-ts* root hair defects. FER(WT)-EYFP protein was successfully  
260 detected in plasma membranes and pFER-FER(WT)-EYFP in *fer-ts* transgenic lines  
261 displayed the normal root hair growth both 20°C and 30°C (See Supplemental Figure  
262 S4). Taken together, these data strongly support that *fer-ts* phenotype is the result of the  
263 G41S mutation of the FERONIA protein.

264

265 **FERONIA is localized to the plasma membrane and G41S substitution does not**  
266 **alter its subcellular localization at non-permissive temperatures**

267 Previously, GFP-fused FERONIA was shown to localize to plasma membranes in  
268 various plant tissues (Duan et al., 2010). In order to confirm the plasma membrane  
269 localization of our fluorescently-tagged FER fusions, and examine whether the presence  
270 of the G41S mutation affected FER(G41S) subcellular localization, we examined the  
271 subcellular distributions of the FER(WT)-EYFP and FER(G41S)-EYFP fusion proteins  
272 in stably transformed plants (Figure 6). At permissive temperatures, FER(WT)-EYFP  
273 was observed primarily in plasma membranes in various tissues such as leaf, root and  
274 root hairs (Figure 6a). Interestingly, FER(WT)-EYFP protein was observed both in  
275 plasma membranes and an apical vesicle population in growing root hairs (Movie S2).  
276 Magnified images of FER(WT)-EYFP indicated that this fusion protein is almost  
277 exclusively plasma membrane localized, and does not display any significant  
278 accumulation in intracellular compartments (Figure 6b).

279 To determine whether the introduction of the G41S substitution in the *fer-ts*  
280 mutant might affect its protein stability, we blocked new protein synthesis by treating  
281 five-day-old *Arabidopsis* seedlings with cycloheximide, and then compared protein



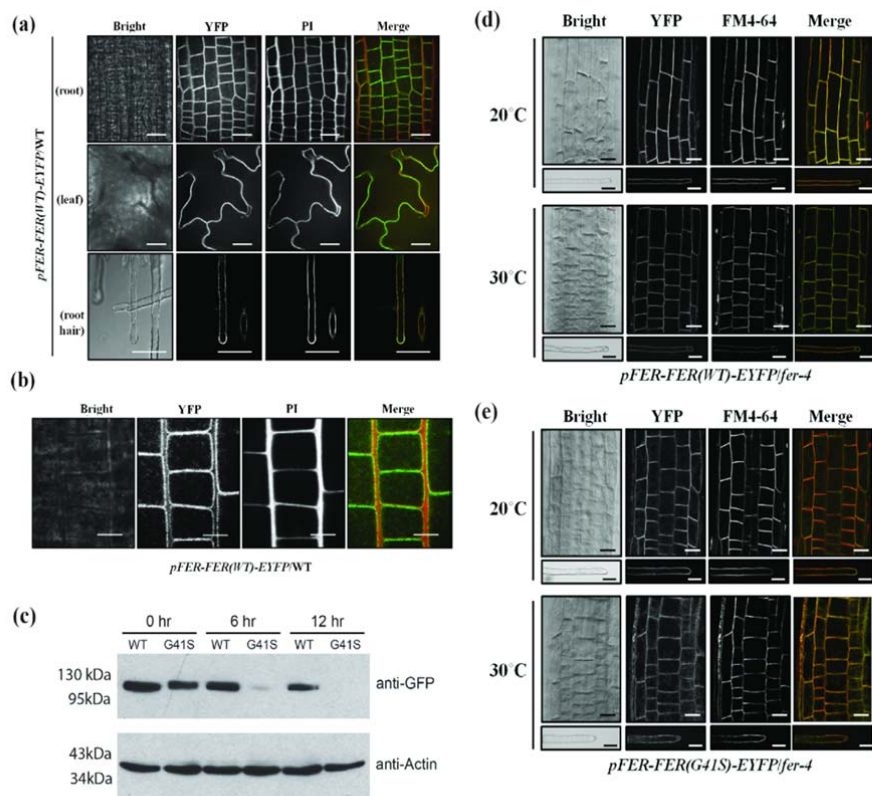

**Figure 6. Subcellular localization of FER(WT)-EYFP and FER(G41S)-EYFP fluorescent fusion proteins in stably transformed *Arabidopsis*.**

(a) Subcellular localization of FER(WT)-EYFP protein in various tissues. Fluorescent confocal images displaying the subcellular distribution of FER(WT)-EYFP protein was detected from growing root, leaf and root hair cells of seven-day-old seedlings in pFER-FER(WT)-EYFP/WT transgenic plants. Cell walls were counter-stained by incubating for 5 min in a propidium iodide (PI) solution (10  $\mu$ g/ml). Images were collected by spinning-disk fluorescence confocal microscopy using a Zeiss 40x Plan-Apochromat (1.3 NA) lens with appropriate EYFP and PI fluorescence filter sets. Scale bars = 20  $\mu$ m. (b) Magnified images of FER(WT)-EYFP fluorescence. FER(WT)-EYFP in wild-type of growing root cells of seven-day-old *A. thaliana* seedlings was detected by spinning-disk confocal microscopy using a Zeiss 100x Plan-Apochromat (1.46 NA) oil immersion objective with appropriate EYFP and PI filter sets. Scale bars = 10  $\mu$ m. (c) Protein turnover rates of FER(WT)-EYFP and FER(G41S)-EYFP at non-permissive temperature (30°C). Five-day old seedling were grown at 20°C and then treated with 200  $\mu$ M cycloheximide and transferred to 30°C. Total proteins were extracted at each time point and the relative levels were determined using immunoblotting with anti-GFP and anti-actin antibodies. FER(G41S)-EYFP levels rapidly decreased during the time course, while levels of FER(WT)-EYFP were not significantly reduced. Actin was used as a loading control. (d-e) Subcellular localization of FER(WT)-EYFP (d) and FER(G41S)-EYFP (e) fluorescent fusions in root and root hair cells at permissive (20°C) and non-permissive (30°C) temperatures. Cells were counterstained with FM4-64 to visualize cell walls. Images were collected by spinning-disk fluorescence confocal microscopy using a Zeiss 40x Plan-Apochromat (1.3 NA) lens with appropriate EYFP and FM4-64 fluorescence filter sets. Scale bars = 20  $\mu$ m; root, 10  $\mu$ m; root hair.

282 turnover rates of the FER(WT)-EYFP and FER(G41S)-EYFP proteins when grown at  
 283 30°C. Overall accumulation of the FER(G41S)-EYFP was reduced significantly during  
 284 the time course, but no significant reduction in protein accumulation was not observed  
 285 for either EYFP(WT)-EYFP or an actin loading control (Figure 6c). These results

286 suggest that *fer-ts* mutant phenotypes may be associated with enhanced turnover due to  
287 protein misfolding.

288           Since the FER(G41S)-EYFP appeared to be less stable than FER(WT)-EYFP  
289 we wanted to check whether might affect the accumulation or subcellular distribution of  
290 this protein in plants subjected to non-permissive temperatures. We therefore compared  
291 the subcellular distributions of FER(WT)-EYFP and FER(G41S)-EYFP at both 20°C  
292 and 30°C (Figure 6d and 6e). While no changes in accumulation or distribution of  
293 FER(WT)-EYFP were observed in roots and root hairs between 20°C and 30°C  
294 conditions (Figure 6c), at 30°C some FER(G41S)-EYFP fluorescence could be observed  
295 in internal subcellular membranes, although significant levels of the FER(G41S)-EYFP  
296 remained at the plasma membranes in these cells even after incubation at 30°C for 6  
297 hours (Figure 6e). Furthermore, FER(WT)-EYFP and FER(G41S)-EYFP subcellular  
298 distributions were visualized in cells in the root elongation zone every 30 s by confocal  
299 microscopy at 20°C for 10 minutes and then subsequently at 30°C for an additional 50  
300 minutes. In both FER(WT)-EYFP and FER(G41S)-EYFP seedlings, significant  
301 fluorescent signal remained associated with the plasma membranes in the cells in these  
302 tissues at both permissive and non-permissive temperatures (Movies S3 and S4).  
303 Interestingly, FER(G41S)-EYFP signal detected in internal subcellular membranes was  
304 significantly higher when plants were continuously incubated at 30°C for 24 hours  
305 (Supplemental Figure S5). These data, when taken together with the rapid onset (<5  
306 minutes) of mutant root hair growth defects, are consistent with a model in which the  
307 mutant FER(G41S) temperature-sensitive phenotypes are caused by inactivation of the  
308 receptor-like activities associated with this protein, and are not simply due to  
309 destabilization of the protein, or its removal from the plasma membrane.

310

311 **The *fer-ts* displays impaired sensitivity to RALF1 peptides in non-permissive**  
312 **temperature conditions**

313 Signaling in the CrRLK1L family of receptor kinases have been linked to a family of  
314 small extracellular peptide hormones called rapid alkalization factors (RALFs;  
315 (Haruta et al., 2014; Stegmann et al., 2017). RALF1, which was previously  
316 demonstrated to suppress cell elongation of the primary root in Arabidopsis and other  
317 plants (Pearce et al., 2001), has now been shown to directly bind with the FER  
318 extracellular domain (Haruta et al., 2014; Stegmann et al., 2017). Because the G41S  
319 mutation appears to affect protein stability at non-permissive temperatures, perhaps by  
320 destabilizing the structure of the extracellular domain of this protein (Figure 6c), we  
321 were curious whether RALF1 suppression of primary root elongation would be affected  
322 in *fer-ts* mutants. As shown in Figure 7, both wild-type seedlings and *fer-ts* mutants  
323 were highly sensitive to active RALF1 peptide under permissive temperature conditions.  
324 However, as previously described, the sensitivity of root growth to RALF1 in *fer-5*  
325 mutant was reduced in comparison to wild-type plants at 20°C (Figure 7a and 7c).  
326 Importantly, sensitivity of *fer-ts* seedlings to RALF1 peptide treatment was dramatically  
327 reduced at 30°C, even though wild-type plants and *fer-5* mutants still responded to  
328 RALF1 peptide treatment with similar levels of root elongation inhibition (Figure 7b  
329 and 7d). These results support the previous determination that RALF1 peptide signaling  
330 occurs through the FER receptor-like kinase, and would be consistent with a model in  
331 which the G41S mutation results in temperature-sensitive inactivation of the  
332 extracellular ligand-binding domain of the FERONIA protein.

333

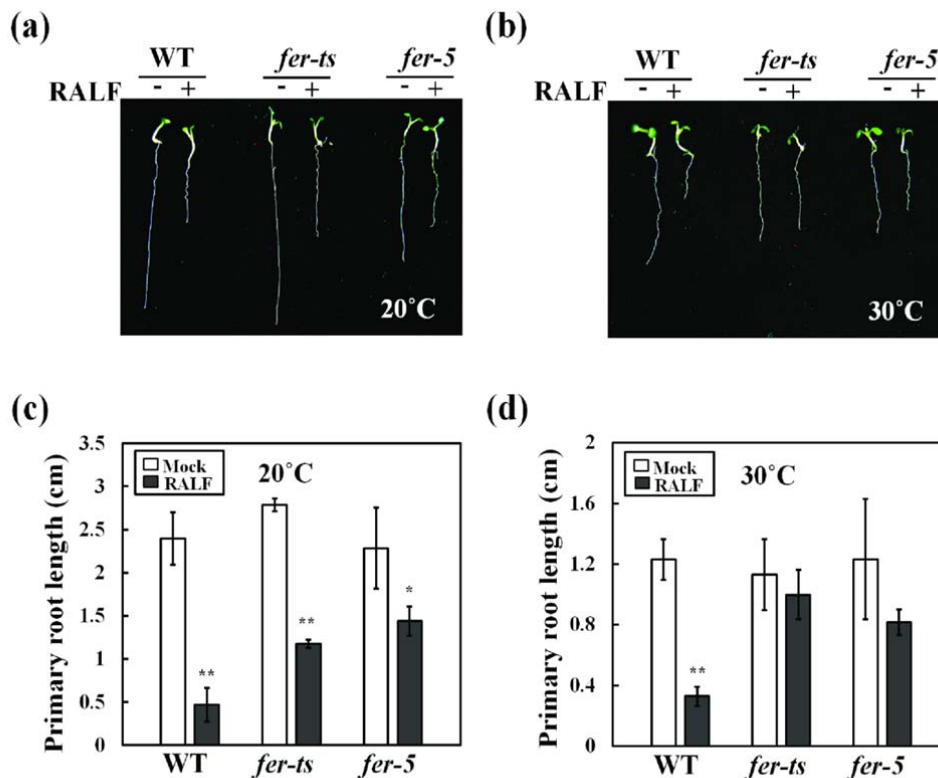

**Figure 7. *fer-ts* mutants are partially insensitive to RALF1 peptide mediated root growth inhibition at non-permissive temperatures.**

Wild-type (WT), *fer-ts*, or *fer-5* plants were germinated and grown for 3 days in 1/2 MS liquid media at 20°C, and then transferred to 1/2 MS liquid media containing 1μM RALF1 peptide (RALF+) or a mock buffer control (RALF-) and grown an additional 3 days at 20°C (a) or 30°C (b). Images of representative seedlings were collected using an Olympus SZX12 stereoscopic microscope. Quantification of primary root lengths (n = 10 seedlings) in the presence or absence of RALF1 peptide treatment in permissive, 20°C (c) and non-permissive, 30°C (d) conditions. Primary root lengths were determined using Image J. Error bars represent SD. \*p<0.05, \*\*p<0.01 by Student's t-test.

334 **ROS accumulation of *fer-ts* was greatly reduced at 30°C and *fer-ts* phenotype was**  
 335 **not rescued by various hormone treatments.**

336 In previous reports, ROS accumulation is highly reduced in *fer-4* and *fer-5* mutants  
 337 especially in root hair tips and primary roots (Duan et al., 2010). In order to investigate  
 338 the ROS accumulation, WT and *fer* mutants were treated with H<sub>2</sub>DCF-DA to monitor  
 339 ROS levels. In WT plants, ROS accumulation was observed in primary roots and root  
 340 hairs, and these levels increased slightly upon NAA treatment at both 20°C and 30°C  
 341 (Figure 8). While *fer-ts* plants showed similar ROS accumulation patterns as those

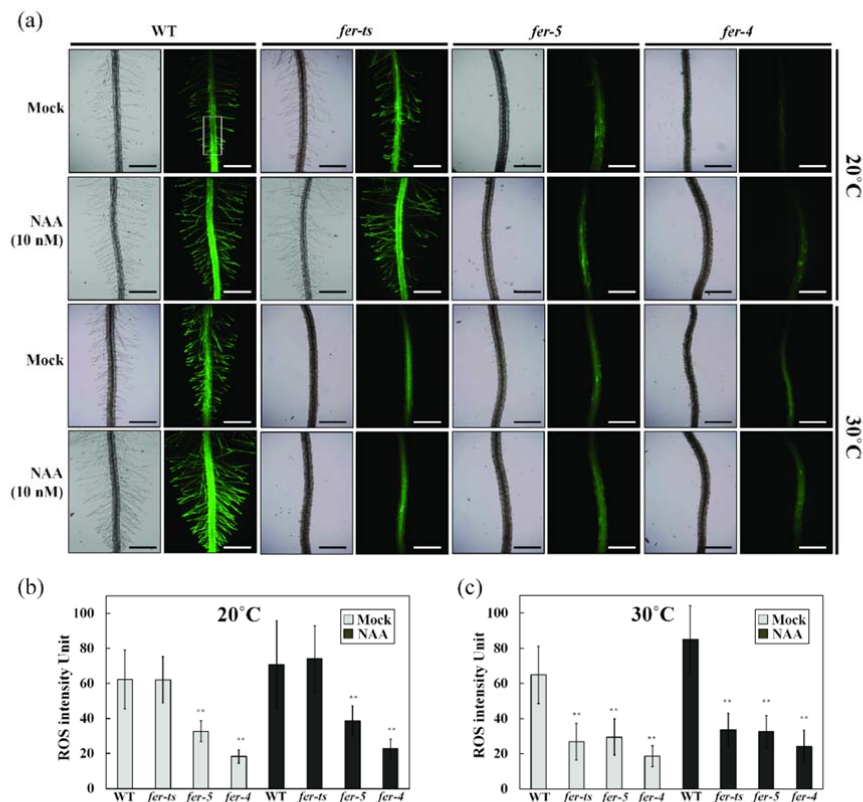

**Figure 8. Detection of ROS in WT, *fer-ts* and *fer-5* primary roots and root hairs.**

(a) ROS accumulation in permissive and non-permissive temperature conditions with or without auxin treatments. Wild-type (WT), *fer-ts*, *fer-4*, or *fer-5* seedlings were grown vertically on 1/4 MS media plates for seven days at permissive (20°C) or non-permissive (30°C) temperatures in the presence or absence of (10 nM NAA). Plates were bathed with five ml of 50  $\mu$ M in H<sub>2</sub>DCF-DA suspended in 1/4xMS liquid media for 5 min, followed by two gentle washes with 10 ml of 1/4 MS. Fluorescence images were collected with a Zeiss Axio Imager Z1 fluorescence microscope with 2.5x objective and green (GFP) filter set. The WT ROS image was acquired by auto-exposure, all other images were acquired using the WT exposure conditions. Scale bars = 500  $\mu$ m. (b) The rectangle in (a) indicates a representative region of interest (ROI) where average ROS intensity was quantified for the samples. Intensities of ROS were quantified by image J program. Error bars represent SD. \*\*p<0.01 by Student's t-test.

342 observed in wild-type plants at 20°C, at 30°C ROS accumulation was dramatically  
 343 reduced both in the absence and presence of NAA (Figure 8a). However, while ROS  
 344 accumulation in the *fer-ts* mutant was strictly temperature dependent (compare Figures  
 345 8b and 8c), these reduced ROS levels were similar to those observed at both  
 346 temperatures for the constitutive *fer-4* and *fer-5* mutants (Figure 8a; compare Figures 8b  
 347 and 8c)

348 In order to investigate how broadly the temperature-sensitive *fer-ts* mutant  
 349 phenocopied *fer-4* and *fer-5* mutants, these three mutants were treated with several

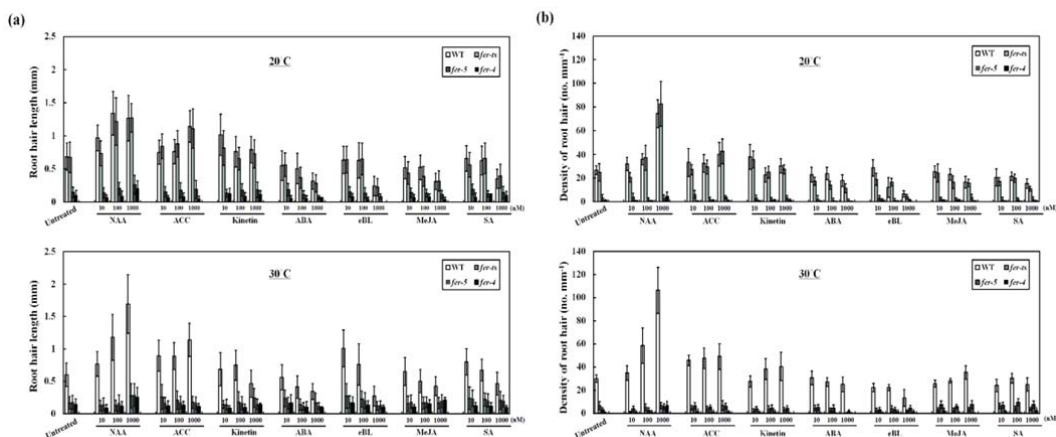

**Figure 9. In non-permissive temperatures, *fer-ts* responds to hormone treatments similarly to *fer-4* and *fer-5* mutants.**

(a and b) Quantification of root hair length and density in permissive (upper panels) and non-permissive temperature (lower panels) in 10, 100, and 1000  $\mu$ M concentrations for each of the various hormone treatments (NAA; Auxin, ACC; ethylene, Kinetin; Cytokinin, ABA; Abscisic acid, eBL; epi-brassinosteroid, MeJA; methyl jasmonic acid, SA; Salicylic acid). Three-day-old seedlings were transferred into 1/2 MS liquid media containing three different concentrations of the indicated hormones. Then, transferred plants were incubated at 20°C and 30°C for seven days before quantification. The root hairs were photographed by Olympus AX-70 microscope and root hair length and densities were determined by image J (1.44 version). Error bars represent SD.

350 different concentrations of hormones, and then root hair lengths and densities were  
 351 measured either at 20°C or 30°C. Root hair lengths and densities displayed the similar  
 352 patterns for both wild-type and *fer-ts* at 20°C, while both *fer-4* and *fer-5* root hairs were  
 353 consistently shorter and less dense (Figure 9a and 9b; upper panels). However at 30°C,  
 354 *fer-ts* root hair lengths and densities largely resembled the *fer-4* and *fer-5* phenotypes  
 355 (Figure 9a and 9b; lower panels). Primary root length, total lateral root number, fresh  
 356 weight, and total leaf numbers of *fer-ts* mutants also displayed a similar temperature-  
 357 dependent trend; resembling wild-type plants with various hormone treatments at 20°C,  
 358 but resembling *fer-4* and *fer-5* mutants at 30°C (See supplemental Figure S6).

359

360 **The *fer-ts* G41S mutation reveals a functionally important role for this highly**  
 361 **conserved glycine residue in CrRLK1L subfamily proteins**

362 The profound effects of the G41S substitution of the *fer-ts* mutant on FER protein  
 363 stability, RALF1 perception, ROS accumulation, and responses to a variety of  
 364 hormones, suggested this mutation rapidly inactivates *FER* signaling at non-permissive

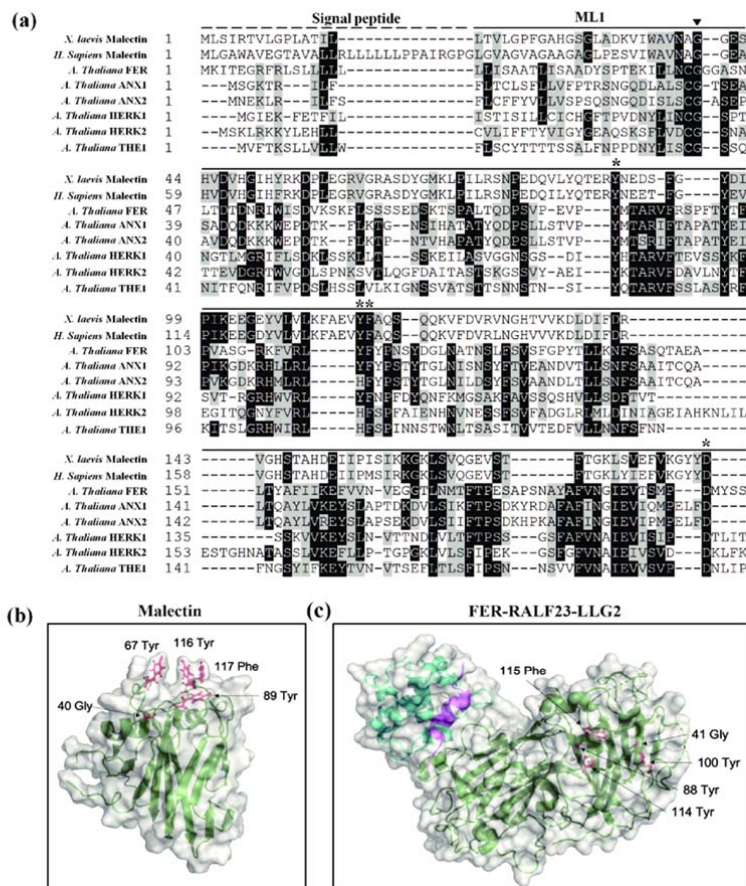

**Figure 10. Localization of the highly conserved glycine mutation in *fer-ts* in *A. thaliana* FERONIA:RALF23:LLG2 and *X. laevis* malectin structures.**

(a) Several residues important for binding carbohydrate ligands are conserved in plant CrRLK1L receptor kinase family members. Sequences analyzed include animal Malectin (*X. laevis* and *H. sapiens*) FERONIA and other well-characterized CrRLK1L homologs in *A. thaliana* (ANXUR1; ANX1, ANXUR1; ANX2, HERCULES1; HERK1 and THESEUS1; THE1). Putative N-terminal signal peptides are indicated as black dashed lines, and malectin and CrRLK1L ML1 domains by solid lines, respectively. The highly conserved G41 of FER is marked by arrowhead. Black boxes indicate fully conserved residues; shaded boxes indicate similar and partially conserved residues. Conserved residues that have been shown to participate in binding nigerose in the *X. laevis* malectin structure are marked by asterisks. Sequence alignment analysis was performed by CLUSTAL Omega program (<http://www.ebi.ac.uk/Tools/msa/clustalo/>) and displayed by using BOXSHADE software ([www.ch.embnet.org/software/BOX\\_form.html](http://www.ch.embnet.org/software/BOX_form.html)). (b) Crystal structure of the *X. laevis* malectin protein (PDB ID: 2K46) with binding pocket aromatic residues and the highly conserved glycine residue based on sequence similarity to FER shown in red. (c) Crystal structure of FER protein (green) in complex with RALF23 ligand (magenta) and GPI-anchored protein LLG2 (blue) (PDB ID: 6A5E). No analogous binding pocket is observed on the ML1 domain, as all conserved aromatic residues (red) are buried within the protein. Both (b and c) were generated using PyMol (DeLano Scientific).

365 temperatures. In addition, a similar G37D mutation is responsible for inactivation of  
 366 THE1, another member of the CrRLK1L family (Hematy et al., 2007), and multiple  
 367 sequence alignment analysis with other Arabidopsis CrRLK1L family members and  
 368 animal malectin sequences showed that the G41 residue of FERONIA is absolutely

369 conserved in these malectins and malectin-like 1 (ML1) domains (Figure 10a, and  
370 Supplemental Figure S7). Interestingly, based on structural studies of animal malectin  
371 proteins, five key residues (Y67, Y89, Y116, F117, D186; Figure 10b, red residues)  
372 were found to form contacts with a bound disaccharide ligand, nigerose, in the active  
373 site as determined by structural analysis of the *X. laevis* malectin protein (Schallus et al.,  
374 2008; Muller et al., 2010). In this malectin structure these surface exposed residues  
375 extend from the malectin fold forming the nigerose binding pocket, with the conserved  
376 glycine (G40) the bottom of this structural region (Figure 10b). While several of the  
377 tyrosine and phenylalanine residues shown to be important for interaction with  
378 carbohydrates in animal malectin proteins are maintained in plant malectin-like domains  
379 (e.g. FERONIA Y88, Y114, F115, D197) (Figure 10a, and Supplemental Figure S7),  
380 these are not surface exposed in the ML1 domain of the recently described crystal  
381 structure of FER (Figure 10c, in green) with its co-receptor LLG2 (Figure 10b, in blue)  
382 and a RALF23 ligand (Figure 10c, in magenta) (Xiao et al., 2019). It is however notable  
383 that in this structure the invariant glycine (G41; Figure 10c, red residue) of the FER  
384 ML1 domain is structurally remote from the RALF23 and LLG2 binding surfaces in the  
385 ML2 domain.

386

387



## 388 **DISCUSSION**

389 In eukaryotes, receptor like kinases (RLKs) have been implicated to play an important  
390 role in many crucial eukaryotic cellular processes, such as cell cycle progression, cell  
391 signaling, embryogenesis, abiotic and biotic stress responses (Shiu and Bleecker, 2001;  
392 Morillo and Tax, 2006; Lehti-Shiu et al., 2009). In this study, we isolated and identified  
393 a temperature-sensitive root hair elongation mutant, which we have determined is a new  
394 mutant *FER* allele that we have called *fer-ts*. The *fer-ts* mutant displays normal overall  
395 growth characteristics at permissive temperature (20°C), but root hair initiation and  
396 elongation are specifically and rapidly inhibited within approximately five minutes  
397 upon transfer of these plants to non-permissive temperature (30°C). We have shown that  
398 the *fer-ts* mutant is the result of a substitution mutation in which a highly conserved  
399 glycine residue in the FER extracellular domain is changed to serine (G41S). FERONIA  
400 is a member of the CrRLK1L subfamily of receptor-like kinases (RLKs) in *Arabidopsis*  
401 and the mutated glycine residue (G41S) is highly conserved in multiple members of the  
402 CrRLK1L family of receptor proteins as well as in animal malectin proteins.

403 While both FER(WT)-EYFP and FER(G41S)-EYFP fusion proteins displayed a  
404 plasma membrane localization at both permissive and non-permissive temperatures,  
405 FER(G41S)-EYFP displayed significantly increased protein turnover 30°C (Figure 6),  
406 that might be consistent with protein misfolding. Increased accumulation of the  
407 FER(G41S)-EYFP in internal membranes upon extended incubation at non-permissive  
408 temperatures would be consistent with at least some of the FER(G41S)-EYFP protein  
409 being retained in the ER due to misfolding (Supplemental Figure S5). However, this  
410 increased protein turnover did not appear to result in loss of accumulation of  
411 FER(G41S)-EYFP in plasma membranes. This is likely due to continued protein

412 synthesis and at least some secretion of these proteins at the non-permissive temperature.  
413 These results, along with the rapid cessation of root hair elongation (<5 min) in non-  
414 permissive temperatures would be consistent with rapid inactivation of FER signaling  
415 activity due to protein inactivation rather than simply depletion of FER activity from the  
416 plasma membrane due to increased turnover.

417 *FER* has been implicated in a variety of plant processes, including roles in root  
418 hair tip growth as well as crucial plant processes, such as pollen tube reception,  
419 hypocotyl elongation, regulation of ABA signaling and controlling seed size (Escobar-  
420 Restrepo et al., 2007; Deslauriers and Larsen, 2010; Duan et al., 2010; Yu et al., 2012;  
421 Yu et al., 2014). In many of these processes, FER signaling appears to regulate ROS  
422 production. In constitutive *fer* mutants, ROS levels are reduced, and FER  
423 overexpression results in increased ROS levels. The observation that the *fer-ts* mutant  
424 also displays reduced ROS levels only at non-permissive temperatures suggests that this  
425 mutation affects FER signaling in a similar fashion as other *fer* mutants, perhaps  
426 providing a powerful tool for elucidation of downstream signaling events associated  
427 with FER function, and indicating that at least one important downstream effect of *FER*  
428 signal transduction is regulation of ROS production. This was elegantly explained by  
429 the discovery that FER recruits ROPGEFs, which in turn activate ROP GTPases,  
430 leading to the stimulation of RHD2 NADPH oxidase dependent ROS production (Duan  
431 et al., 2010). Therefore, FER mediated regulation of ROS production is likely important  
432 and tightly controlled for many cellular functions.

433 Based on sequence comparison, the extracellular domains of members of the  
434 CrRLK1L subfamily of plant RLK proteins might be predicted to share some structural  
435 similarity to the mammalian malectin protein (Schallus et al., 2008). Malectin was first

436 identified and characterized in *X. laevis* as carbohydrate binding protein of the  
437 endoplasmic reticulum where it plays an important role in the early steps of protein N-  
438 glycosylation for biogenesis of glycoproteins (Schallus et al., 2008). Based on NMR  
439 structure analysis, there are five key residues in the malectin domain (Y67, Y89, Y116,  
440 F117, D186) that are located in pocket-shaped structure and these aromatic residues and  
441 the aspartate mediate interactions with the glucose residues of maltose and nigerose di-  
442 saccharide ligands (Schallus et al., 2008). In plants, malectin-like domains are mainly  
443 found in CrRLK1L subfamily with a low overall sequence identity with animal  
444 malectins (Shiu and Bleecker, 2003). In FER, two malectin-like domains, ML1 and  
445 ML2, are found as a tandem-repeat in the extracellular domain. Interestingly, several  
446 key residues found in the ligand-binding pocket of the animal malectin structure are  
447 maintained in the malectin-like domains of FER and other plant CrRLK1L family  
448 members (Schallus et al., 2008). However, the discovery that members of a family of  
449 small secreted peptides, RALFs, rather than cell wall polysaccharides or  
450 oligosaccharides, serve as important ligands for FER and other CrRLK1L family  
451 receptors (Haruta et al., 2014; Ge et al., 2017; Stegmann et al., 2017; Gonneau et al.,  
452 2018) might indicate that these extracellular domains may interact with ligands in a  
453 manner distinct from their animal counterparts. Indeed the recent structural  
454 characterization of ANX1/2 extracellular domains (Du et al., 2018) and the FER  
455 extracellular domain in complex with RALF23 and the FER co-receptor, LLG2 (Xiao et  
456 al., 2019) has shown that the RALF23 binding domain and interaction with LLG2  
457 occurs primarily with the ML2 domain, and that conserved tyrosine and phenylalanine  
458 residues in CrRLK1L malectin folds in these structures appear to be buried within the  
459 ML1 fold, and therefore likely unavailable to interact with cell wall carbohydrates in a

460 manner similar to animal malectins.

461         On the other hand, analysis of the animal and plant malectin domains, reveals an  
462 additional invariant glycine residue, that is present in all animal and plant malectin  
463 sequences, and which is also found in close proximity to pocket-shape ligand-binding  
464 cleft determined in the structure of the animal ML1 domain. This invariant glycine is  
465 replaced with a serine (G41S) in the *fer-ts* mutation described in this paper. The highly  
466 conserved nature of this glycine residue, and the rapid elimination of FER signaling at  
467 non-permissive temperatures, suggests a critical role for the FER ML1 domain in ligand  
468 binding or transduction of a ligand-binding signal in members of the CrRLK1L family  
469 of receptor-like kinases. Indeed, mutation of an analogous glycine residue to aspartic  
470 acid (G37D) in the extracellular domain of THESEUS in the *the1-1* mutant also results  
471 in a loss of function mutation in this RLK (Hematy et al., 2007). The *the1-1* mutation  
472 also results in its insensitivity to its specific RALF ligand, RALF34 (Gonneau et al.,  
473 2018). Similarly, the response of *fer-ts* mutant to treatment with RALF1 peptide was  
474 dramatically reduced under non-permissive temperature conditions (Figure 7). Precisely  
475 how the G41S *fer-ts* mutation, which is structurally distant from the RALF23 peptide  
476 binding surface in the FER ML2 domain, would directly block RALF peptide  
477 perception and signaling is unclear. One potential explanation may involve the recent  
478 discovery of links between *FER* signaling and pectin dynamics during salt stress (Chen  
479 et al., 2016; Feng et al., 2018) and fertilization events (Duan et al., 2020). During salt  
480 stress, *FER* appears to sense cell wall softening and both FER ML1 and FER ML2  
481 domains were shown to directly interact with pectin *in vitro* (Feng et al., 2018). More  
482 recently, *FER* function was shown to be required in order to maintain de-esterified  
483 pectin levels in the filiform apparatus during pollination and fertilization events (Duan

484 et al., 2020), Whether the G41S mutation in *fer-ts*, or other analogous mutations of this  
485 invariant glycine residue in other CrRLK1L receptors affect the ability of these  
486 receptors to interact with or regulate pectin dynamics in plant cell walls is an intriguing  
487 possibility that warrants future investigation.

488

## 489 **EXPERIMENTAL PROCEDURES**

### 490 **Plant materials and growth conditions**

491 *Arabidopsis thaliana* ecotype Columbia (Col-0), the *fer-ts* mutant was isolated from an  
492 EMS mutagenized population of wild-type (Col-0) stably transformed with a single  
493 copy of EYFP-RabAb4 driven by a 35S promoter (Preuss et al., 2004; Weigel and  
494 Glazebrook, 2006), and two FERONIA T-DNA insertional mutants (designated as *fer-ts*  
495 and two T-DNA insertion mutants, *GABI-GK106A06* (designated as *fer-4*) and  
496 *SALK\_029056c* (designated as *fer-5*) (Duan et al., 2010) were used in this study. Seeds  
497 were sterilized by soaking in 1% bleach solution for 10 min; after washing five times  
498 with sterilized water, they were sown onto agar plates for germination. Five- to seven-  
499 day-old *A. thaliana* seedlings used in the root-hair growth assays were grown vertically  
500 on plates containing 0.25x Murashige and Skoog (Sigma-Aldrich) medium at pH 5.7  
501 supplemented with 0.6% (w/v) phytigel at 20°C under long day conditions (16 h light/8  
502 h dark cycle). For harvesting seeds, seedling plants were transferred to soil and grown  
503 to maturity at 20°C under long day conditions.

504

### 505 **Quantification of root hair elongation in *fer-ts* under permissive and non- 506 permissive temperatures**

507 To characterize root hair growth defective phenotypes in the *fer-ts* mutant, bright-field

508 microscopy was carried out using a Nikon Eclipse E600 wide-field microscope with a x  
509 10 Plan Apo (0.45 NA) lens as previously described in (Preuss et al., 2004). The *fer-ts*  
510 mutants were germinated and grown vertically on plates containing 0.25x MS medium  
511 at pH 5.7 supplemented with 0.6% (w/v) phytigel at 20°C for 7 days and then  
512 transferred to 30°C and grown for 6 hours before returning back to 20°C growth  
513 conditions for an additional 24 hours, when images of roots and root hairs were then  
514 collected. Time-lapse video microscopic analysis was carried out under permissive and  
515 non-permissive temperature conditions in wild-type and *fer-ts* mutants as described  
516 previously (Preuss et al., 2004). Images of growing root hairs were collected every 5 s from  
517 seedlings by time-lapse video microscopy. The temperatures of MS medium from  
518 permissive to non-permissive temperatures were controlled by an inline single-channel  
519 automatic temperature controller (Werner Instruments, Hamden, CT, model:TC-324B)  
520 controlled by a dry air thermostat inserted into the growth chamber and situated  
521 approximately 2 mm from the ROI. Temperatures were actively recorded using an  
522 Infrared Thermometer (Kintrex Inc., Vienna, VA, model:IRT0424). Raw image  
523 sequences were cropped with Adobe Photoshop and imported into Fiji-ImageJ  
524 (Schindelin et al., 2012) to generate time projections using the Stacks function.  
525 Quantification of root-hair lengths, growth rates, and densities were quantified by using  
526 calibrate and measure functions.

527

### 528 **Map-based cloning and full genome sequencing of *fer-ts***

529 Self-fertilized, backcrossed *fer-ts* (ecotype; Columbia) mutants were crossed with  
530 Landsberg wild-type plants to generate a mapping population. F<sub>1</sub> crossed plants were  
531 checked for heterozygosity with the SSLP marker “nga8” that is polymorphic between

532 Col-0 and *Ler* (Bell and Ecker, 1994). Homozygous *fer-ts* plants were selected from the  
533 segregating F2 population by germination on MS media plates at 20°C, and subsequent  
534 analysis of root hair tip growth defective phenotypes in non-permissive growth  
535 temperatures (30°C). Homozygous plants displaying *fer-ts* phenotypes were grown to  
536 maturity at 20°C and seed were collected. Genomic DNA was isolated using Qiagen  
537 Plant DNA mini kits, and SSLP markers were used for rough mapping the *fer-ts* mutant  
538 lesion, which was initially located on chromosome 3 between the SSLP markers *NIT 1.2*  
539 and *NGA6*. Low-resolution mapping narrowed the location of the *fer-ts* mutant locus to  
540 an approximately 2 Mb region of chromosome 3, and full genome sequencing was  
541 performed to further determine the *fer-ts* mutation within this region. Libraries were  
542 generated for both the *fer-ts* and wild-type (ecotype Columbia) extracted DNA using  
543 Illumina TruSeq DNA kits and barcoded for multiplexing by the University of  
544 Michigan DNA Sequencing Core. Samples were sequenced on an Illumina MiSeq  
545 platform with paired-end 150 bp cycles. Sequence reads were checked for quality using  
546 FastQC then aligned to the TAIR9 genome using Bowtie2. Potential SNPs were  
547 identified using Freebayes. Additional analysis of sequence variants within the low-  
548 resolution mapped 2 Mb region of chromosome 3 to eliminate SNPs common to our re-  
549 sequenced Col-0 population and the *fer-ts* allele were sorted for context and predicted  
550 effect using a custom PERL script.

551

### 552 **Fluorescence microscopic analysis**

553 For pFER-FER(WT)-EYFP and pFER-FER(G41S)-EYFP transgenic plants, full-length  
554 of *FERONIA* including approximately 2 kb promoter was prepared by PCR reaction and  
555 sub cloned into the pCAMBIA-EYFP-C1 expression vector (Preuss et al., 2004). Wild-

556 type and mutant *FERONIA* sequences were amplified from genomic DNA isolated from  
557 wild-type and *fer-ts* mutant plants using PCR. To produce pFER-FER(WT)-EYFP and  
558 pFER-FER(G41S)-EYFP transgenic plants, these constructs were introduced into *A.*  
559 *tumefaciens* strain GV3101, and *Arabidopsis* plants were transformed with *A.*  
560 *tumefaciens* using the ‘floral-dip’ method (Clough and Bent, 1998). The transgenic  
561 plants were selected by germination on 25 mg/L of hygromycin-containing medium  
562 (Duchefa, Haarlem, The Netherlands) under long day conditions (16 h light/8 h dark  
563 cycle) at 20°C. Confocal images were generated using a laser confocal microscope  
564 (Zeiss Observer.A1) connected to a CSU10 confocal scanner unit (Yokogawa, Japan)  
565 and a 10x Plan-Neofluar (0.3 NA lens), 40x Plan-Apochromat (1.3 NA lens) or 100x  
566 Plan-Apochromat (1.46 NA lens) oil objective with 491 nm laser excitation and a 535  
567 nm emission filter for EGFP and EYFP fluorescence. Images were collected with a  
568 Hamamatsu C9100-50 camera operated using the Volocity software version 5 (the  
569 electron-multiplying (EM)-CCD detector gain settings were 123, 116 and 190 for  
570 images collected with x10, x40 and x100 objectives, respectively). Time-lapse  
571 fluorescent images were taken every 5 s using temperature controlled chambers (DeBolt  
572 et al., 2007).

573

#### 574 **RT-PCR analysis**

575 For detection of *FERONIA* expression in wild-type, *fer-4*, *fer-5* and *fer-ts* plants, plants  
576 frozen immediately in liquid nitrogen. Two microgram aliquots of total RNA extracted  
577 from the wild-type or mutant seedlings were used for reverse transcription primed by  
578 oligo(dT). Superscript III (Invitrogen, USA) was used for the reverse transcription  
579 reaction according to the manufacturer’s instructions. One microliter aliquot of the



580 reaction mixture was used for subsequent PCR analysis. *Actin* was used as a quantifying  
581 control.

582

### 583 **Detection of ROS in root**

584 ROS detection by using H<sub>2</sub>DCF-DA in root hair and primary root was performed  
585 following the protocol described previously (Duan et al., 2014). Briefly, Arabidopsis  
586 seedlings were germinated grown vertically on 1/4x MS media plates for seven days at  
587 permissive (20°C) or non-permissive (30°C) temperatures. Plates were bathed with  
588 five ml of 50 μM in H<sub>2</sub>DCF-DA (Sigma-Aldrich) suspended in 1/4xMS liquid media for  
589 5 min, followed by two gentle washes with 10 ml of 1/4xMS. Fluorescence images were  
590 collected with a Zeiss Axio Imager Z1 fluorescence microscope with 2.5x objective and  
591 green (GFP) filter set.

592

### 593 **Effect of RALF1 peptide for root growth inhibition in *fer-ts* mutant**

594 Synthetic Arabidopsis RALF1 polypeptide was synthesized by using 9-fluorenylmethyl  
595 chloroformate solid-phase chemistry with a peptide synthesizer from Thermo Scientific  
596 company and confirmed by MALD-TOF analysis (Applied Biosystems Voyager System  
597 2098, USA). After synthesis, 5 mg of reduced synthetic polypeptide was oxidized by  
598 dissolving in 25 ml of degassed 0.1 M ammonium bicarbonate and incubating for 2 days  
599 in an opened flask under 4°C, then lyophilized. Lyophilized RALF1 powder was re-  
600 suspended in 10 ml of PBS buffer followed by two buffer exchange steps using Amicon  
601 Ultra centrifugal filter (Ultracel-3K, 3000g for 45 min each) to remove any residual  
602 ammonium bicarbonate. Seedling germination was performed in 1/2x MS liquid

603 medium at 20°C for 3 days in long-day conditions (16-h days with 150  $\mu\text{E}\cdot\text{m}^{-2}\cdot\text{s}^{-1}$  (E,  
604 Einstein; 1 E = 1 mol of photons) light intensity. After 3 days, germinated Arabidopsis  
605 seeds were transferred to 6 well Falcon tissue culture plate with 3 ml of 1/2xMS liquid  
606 media containing 1  $\mu\text{M}$  RALF1 or an equal volume of PBS and agitated on a shaker at  
607 100 rpm (Model VS2010, Vision Scientific CO.,LTD) for an additional 3 days at 20°C  
608 or 30°C. All solutions were filter-sterilized (0.2  $\mu\text{m}$  pores, Minisart 16534), and the  
609 seedlings were photographed 3 days after being transferred to the media. Quantification  
610 of primary root length was measured using ImageJ software.

611

#### 612 **Accession numbers**

613 Sequences of the genes in this paper may be found in the GeneBank/EMBL database  
614 library under the following accession numbers: At3g51550 (FER), At4g39990  
615 (RabA4b), At3g18780 (Actin2), At3g04690 (ANX1), At5g28680 (ANX2), At3g46290  
616 (HERK1), At1g30570 (HERK2), At5g54380 (THE1), NP\_001085212.1 (*X. laevis*  
617 Malectin), NP\_055545.1 (*H. sapiens* Malectin).

618

#### 619 **ACKNOWLEDGEMENTS**

620 We thank to Dr. Hen-Ming Wu and Dr. Alice Cheung (University of Massachusetts) for  
621 providing *fer-4* and *fer-5* mutants, and Jiyuan Yang for assistance in assembling and  
622 editing the manuscript. This research was supported by the U.S. Department of Energy  
623 Office of Science, Office of Basic Energy Sciences, Physical Biosciences program (DE-  
624 FG02-07ER15887; S.P., F.G., J.C., and E.N.), the National Science Foundation under  
625 Grant No. 1817697 (A.A., H.M, and E.N.), and the BK21plus program of the Ministry  
626 of Education, Science and Technology in Korea (D.K., and J-D.B.). This work used the

627 Extreme Science and Engineering Discovery Environment (XSEDE; (John W Towns,  
628 2014), which is supported by National Science Foundation grant number ACI-1548562.

629

## 630 **FIGURE LEGENDS**

631 **Figure 1.** Isolation of a temperature-sensitive root hair growth defect mutant.

632 (a) Seven day-old seedling plants were grown vertically in 1/4 MS media under 20°C  
633 and transferred to 30°C for 6 h, followed by 24 h recovery at 20°C. Bright field images  
634 were collected with a Nikon Eclipse E600 wide-field microscope with a 20x Plan Apo  
635 DIC (0.75 NA) lens. Dashed lines indicate root tip positions when seedling plants were  
636 transferred to 30°C condition for 6 hours, and again when they were transferred back to  
637 20°C. Scale bars = 200 μm. (b) Localization of EYFP-RabA4b protein in growing root-  
638 hair cells of *fer-ts* mutants at 20°C and 30°C. Medial root hair sections were collected  
639 using spinning-disk confocal microscopy from growing root-hair cells of seven-day-old  
640 seedlings stably expressing EYFP-RabA4b in the *fer-ts* mutant in 20°C (left) or 30°C  
641 (right) using a Zeiss 40x Plan-Apochromat (1.3 NA) lens and appropriate EYFP  
642 fluorescence filter sets. Scale bars = 10 μm. Insets, magnified images to show details of  
643 EYFP-RabA4b subcellular localization in root-hair tips. Scale bars = 2 μm. (c)  
644 Quantification of root hair length in WT and *fer-ts* mutants under 20°C (wild-type  
645 (n=392), *fer-ts* (n=454)) and 30°C (wild-type (n=185), *fer-ts* (n=23)) conditions. (d)  
646 Calculation of root hair densities in WT and *fer-ts* mutants at 20°C (wild-type (n=392),  
647 *fer-ts* (n=454)) and 30°C (wild-type (n=185), *fer-ts* (n=23)) in fully expanded primary  
648 roots of seven-day old plants. In each case, root hair lengths and densities were  
649 measured from n=20 individual seedlings. Error bars represent SD. \*\*p<0.001 by

650 Student's *t*-test.

651

652 **Figure 2.** Root hair growth dynamics in WT and *fer-ts* seedlings.

653 (a) Root hair tip-growth in WT and *fer-ts* mutant plants under permissive (20°C) and  
654 non-permissive (30°C) temperatures by time-lapse microscopy. Bright field images of  
655 growing root hairs of WT and *fer-ts* mutant plants were collected every minute by time-  
656 lapse microscopy using a Zeiss 40x Plan-Apochromat (1.3 NA) lens. Representative  
657 images of WT and *fer-ts* mutant root hair elongation are presented at 10 min intervals.  
658 (b) Quantitative analysis of WT (n=4) and *fer-ts* mutant (n=4) root hair lengths upon  
659 transition to 30°C. WT (black squares) and *fer-ts* (black triangles) mutant root hair  
660 elongation were measured every five minutes and root hair lengths were determined  
661 using the measure function in Image J (1.44 version) The dashed line indicates  
662 transition from 20°C to 30°C. Error bars represent SD. \*p<0.05, \*\*p<0.01 by Student's  
663 *t*-test.

664

665 **Figure 3.** Temperature-sensitive subcellular dynamics of EYFP-RabA4b labeled  
666 compartments in growing root hairs in *fer-ts* mutants.

667 (a) Localization of EYFP-RabA4b protein in growing root-hair cells of *fer-ts* mutant at  
668 permissive (20°C) or non-permissive (30°C) temperature conditions. Growing *fer-ts* root  
669 hairs were imaged at one minute intervals for 30 min at 20°C at which the growth  
670 chamber temperature was raised to 30°C. For each time point, both bright field (Bright)  
671 and fluorescence (YFP) images were collected sequentially, and tip-localized EYFP-  
672 RabA4b compartments were monitored by spinning-disk fluorescence confocal

673 microscopy using a Zeiss 40x Plan-Apochromat (1.3 NA) lens with appropriate EYFP  
674 fluorescence filter sets. The dashed line indicates the temperature transition from 20°C  
675 to 30°C. Merge indicates overlapped images of bright and EYFP fluorescent signals. (b)  
676 Monitoring of chamber temperatures of *fer-ts* mutant. Insert, transition of the growth  
677 chamber temperature from 20°C up to 30°C were measured every 1 min by dry air  
678 thermostat situated in close proximity (~2 mm) from the growing root hair. (c)  
679 Quantification of root hair elongation and EYFP-RabA4b root hair tip localization. Root  
680 hair length and EYFP-RabA4b fluorescence were quantified by Image J (1.44 version)  
681 program every 1 min.

682

683 **Figure 4.** Map-based cloning of *fer-ts*.

684 (a) A linear diagram of the Arabidopsis third chromosome is shown, with a magnified  
685 F24M12 marker region displayed below. The centromere is indicated with filled-  
686 rectangle. Low-resolution map-based cloning resulted in identification of the *fer-ts*  
687 locus within an approximately 2 Mb region of chromosome III bounded by markers  
688 NIT1.2 and CIW19 (Double headed arrow). (b) SNPs specific to the *ts*-mutant within  
689 this region were identified using whole genomic resequencing, followed by targeted  
690 resequencing of genomic DNA sequencing of *fer-ts* and wild-type parental lines. A  
691 single G→A substitution was found in *FERONIA* (At3g51550). The arrowhead  
692 indicates G121A substituted mutation in *FERONIA* gene locus. (c) Schematic diagram  
693 of *FERONIA* protein domains and mutation regions, composed of an N-terminal  
694 extracellular domain (tandem repeat malectin-like domains; ML1 and ML2), TM  
695 (transmembrane) domain in the middle region and a C-terminal kinase domain  
696 (serine/threonine kinase), end of N-terminus has signal peptide (SP) sequence for

697 plasma-membrane trafficking. The *fer-4* and *fer-5* mutants displayed that T-DNA was  
698 inserted in malectin-like domain 1 and kinase domain, respectively. (d) RT-PCR  
699 analysis of T-DNA inserted mutants and EMS mutants. FER (K) and FER (ExDo) was  
700 amplified using pair of P1 and P2 primers and P3 and P4 primers, respectively. Actin  
701 was used as a loading control.

702

703 **Figure 5.** The *fer-ts* mutant confers ts-root hair growth defects when crossed with *fer-4*  
704 and *fer-5* mutants.

705 (a) Wild-type (WT), *fer-4*, *fer-5*, and F1 progeny from crosses (paternal = *fer-ts*,  
706 maternal = *fer-4* or *fer-5*) of *fer-ts/fer-4* and *fer-ts/fer-5* were grown vertically for seven  
707 days at 20°C, transferred to 30°C for 6 h, and then grown for an additional 24 h at 20°C.  
708 Bright field images were collected with a Nikon Eclipse E600 wide-field microscope  
709 with a 20x Plan Apo DIC (0.75 NA) lens. Both *fer-ts/fer-4* and *fer-ts/fer-5* progeny  
710 clearly demonstrated a ts-dependent root hair phenotype. Scale bars = 200 μm. (b)  
711 Schematic diagram of the *FERONIA* gene structure. Open and filled boxes indicate  
712 untranslated regions (UTRs) and exon regions, respectively. The locations of T-DNA  
713 insertion mutants (*fer-4* and *fer-5*) and *fer-ts* are indicated by triangles and arrows,  
714 respectively. (c) Genotyping of crossed F1 plants. Genomic DNA was extracted from F1  
715 generation plants and subjected PCR to confirm presence of the *fer-4* and *fer-5*  
716 genotypes (d) Both *fer-4* and *fer-5* display temperature-dependent root hair phenotypes  
717 when transformed with a fluorescently-tagged FER construct containing the *fer-ts*  
718 mutation (pFER-FER(G41S)-EYFP). Seven-day old seedlings were grown vertically for  
719 seven days at 20°C, transferred to 30°C for 6 h, and then grown for an additional 24 h at

720 20°C. Bright field images were collected with a Nikon Eclipse E600 wide-field  
721 microscope with a 20x Plan Apo DIC (0.75 NA) lens. Presence of the transgenic pFER-  
722 FER(G41S)-EYFP construct clearly demonstrated a ts-dependent root hair phenotype.  
723 Scale bars = 200 µm.

724

725 **Figure 6.** Subcellular localization of FER(WT)-EYFP and FER(G41S)-EYFP  
726 fluorescent fusion proteins in stably transformed *Arabidopsis*.

727 (a) Subcellular localization of FER(WT)-EYFP protein in various tissues. Fluorescent  
728 confocal images displaying the subcellular distribution of FER(WT)-EYFP protein was  
729 detected from growing root, leaf and root hair cells of seven-day-old seedlings in *pFER*-  
730 *FER(WT)-EYFP/WT* transgenic plants. Cell walls were counter-stained by incubating  
731 for 5 min in a propidium iodide (PI) solution (10 µg/ml). Images were collected by  
732 spinning-disk fluorescence confocal microscopy using a Zeiss 40x Plan-Apochromat  
733 (1.3 NA) lens with appropriate EYFP and PI fluorescence filter sets. Scale bars = 20 µm.

734 (b) Magnified images of FER(WT)-EYFP fluorescence. FER(WT)-EYFP in wild-type  
735 of growing root cells of seven-day-old *A. thaliana* seedlings was detected by spinning-  
736 disc confocal microscopy using a Zeiss 100x Plan-Apochromat (1.46 NA) oil  
737 immersion objective with appropriate EYFP and PI filter sets. Scale bars = 10 µm. (c)

738 Protein turnover rates of FER(WT)-EYFP and FER(G41S)-EYFP at non-permissive  
739 temperature (30°C). Five-day old seedling were grown at 20°C and then treated with  
740 200 µM cycloheximide and transferred to 30°C. Total proteins were extracted at each  
741 time point and the relative levels were determined using immunoblotting with anti-GFP  
742 and anti-actin antibodies. FER(G41S)-EYFP levels rapidly decreased during the time  
743 course, while levels of FER(WT)-EYFP were not significantly reduced. Actin was used

744 as a loading control. (d-e) Subcellular localization of FER(WT)-EYFP (d) and  
745 FER(G41S)-EYFP (e) fluorescent fusions in root and root hair cells at permissive (20°C)  
746 and non-permissive (30°C) temperatures. Cells were counterstained with FM4-64 to  
747 visualize cell walls. Images were collected by spinning-disk fluorescence confocal  
748 microscopy using a Zeiss 40x Plan-Apochromat (1.3 NA) lens with appropriate EYFP  
749 and FM4-64 fluorescence filter sets. Scale bars = 20 µm; root, 10 µm; root hair.

750

751 **Figure 7.** *fer-ts* mutants are partially insensitive to RALF1 peptide mediated root  
752 growth inhibition at non-permissive temperatures.

753 Wild-type (WT), *fer-ts*, or *fer-5* plants were germinated and grown for 3 days in ½ MS  
754 liquid media at 20°C, and then transferred to ½ MS liquid media containing 1µM  
755 RALF1 peptide (RALF+) or a mock buffer control (RALF-) and grown an additional 3  
756 days at 20°C (a) or 30°C (b). Images of representative seedlings were collected using an  
757 Olympus SZX12 stereoscopic microscope. Quantification of primary root lengths (n =  
758 10 seedlings) in the presence or absence of RALF1 peptide treatment in permissive,  
759 20°C (c) and non-permissive, 30°C (d) conditions. Primary root lengths were  
760 determined using Image J. Error bars represent SD. \*p<0.05, \*\*p<0.01 by Student's *t*-  
761 test.

762

763 **Figure 8.** Detection of ROS in WT, *fer-ts* and *fer-5* primary roots and root hairs.

764 (a) ROS accumulation in permissive and non-permissive temperature conditions with or  
765 without auxin treatments. Wild-type (WT), *fer-ts*, *fer-4*, or *fer-5* seedlings were grown  
766 vertically on ¼ MS media plates for seven days at permissive (20°C) or non-permissive  
767 (30°C) temperatures in the presence or absence of (10 nM NAA). Plates were bathed



768 with five ml of 50 uM in H<sub>2</sub>DCF-DA suspended in ¼ MS liquid media for 5 min,  
769 followed by two gentle washes with 10 ml of ¼ MS. Fluorescence images were  
770 collected with a Zeiss Axio Imager Z1 fluorescence microscope with 2.5x objective and  
771 green (GFP) filter set. The WT ROS image was acquired by auto-exposure, all other  
772 images were acquired using the WT exposure conditions. Scale bars = 500 µm. (b) The  
773 rectangle in (a) indicates a representative region of interest (ROI) where average ROS  
774 intensity was quantified for the samples. Intensities of ROS were quantified by image J  
775 program. Error bars represent SD. \*\*p<0.01 by Student's *t*-test.

776

777 **Figure 9.** In non-permissive temperatures, *fer-ts* responds to hormone treatments  
778 similarly to *fer-4* and *fer-5* mutants.

779 (a and b) Quantification of root hair length and density in permissive (upper panels) and  
780 non-permissive temperature (lower panels) in 10, 100, and 1000 uM concentrations for  
781 each of the various hormone treatments (NAA; Auxin, ACC; ethylene, Kinetin;  
782 Cytokinin, ABA; Abscisic acid, eBL; epi-brassinosteroid, MeJA; methyl jasmonic acid,  
783 SA; Salicylic acid). Three-day-old seedlings were transferred into ½ MS liquid media  
784 containing three different concentrations of the various hormones. Then, transferred  
785 plants were incubated at 20°C and 30°C for seven days before quantification. The root  
786 hairs were photographed by Olympus AX-70 microscope and root hair length and  
787 densities were determined by image J (1.44 version). Error bars represent SD.

788

789 **Figure 10.** Localization of the highly conserved glycine mutation in *fer-ts* in *A. thaliana*  
790 FERONIA:RALF23:LLG2 and *X. laevis* malectin structures.

791 (a) Several residues important for binding carbohydrate ligands are conserved in plant

792 CrRLK1L receptor kinase family members. Sequences analyzed include animal  
793 Malectin (*X. laevis* and *H. sapiens*) FERONIA and other well-characterized CrRLK1L  
794 homologs in *A. thaliana* (ANXUR1; ANX1, ANXUR1; ANX2, HERCULES1; HERK1  
795 and THESEUS1; THE1). Putative N-terminal signal peptides are indicated as black  
796 dashed lines, and malectin and CrRLK1L ML1 domains by solid lines, respectively. The  
797 highly conserved G41 of FER is marked by arrowhead. Black boxes indicate fully  
798 conserved residues; shaded boxes indicate similar and partially conserved residues.  
799 Conserved residues that have been shown to participate in binding nigerose in the  
800 *X.laevis* malectin structure are marked by asterisks. Sequence alignment analysis was  
801 performed by CLUSTAL Omega program (<http://www.ebi.ac.uk/Tools/msa/clustalo/>)  
802 and displayed by using BOXSHADE software  
803 ([www.ch.embnet.org/software/BOX\\_form.html](http://www.ch.embnet.org/software/BOX_form.html)). (b) Crystal structure of the *X. laevis*  
804 malectin protein (PDB ID: 2K46) with binding pocket aromatic residues and the highly  
805 conserved glycine residue based on sequence similarity to FER shown in red. (c)  
806 Crystal structure of FER protein (green) in complex with RALF23 ligand (magenta) and  
807 GPI-anchored protein LLG2 (blue) (PDB ID: 6A5E). No analogous binding pocket is  
808 observed on the ML1 domain, as all conserved aromatic residues (red) are buried within  
809 the protein. Both (b and c) were generated using PyMol (DeLano Scientific).

810

## 811 **SUPPORTING INFORMATION**

812 Additional supporting Information may be found in the online version of this article.

813 **Figure S1.** Primary root growth of *fer-ts* mutants under permissive and non-permissive  
814 temperature conditions.

815 **Figure S2.** Subcellular dynamics of EYFP-RabA4b labeled compartments in growing

816 root hairs in wild-type plants in permissive and non-permissive temperature conditions.

817 **Figure S3.** Confirmation of *fer-ts* phenotype by crossing with *fer-4* and *fer-5* mutant.

818 **Figure S4.** Complementation of *fer-ts* mutant by pFER::FER(WT)-EYFP.

819 **Figure S5.** Subcellular localization of pFER::FER(G41S)-EYFP grown in extended on-

820 permissive temperature conditions.

821 **Figure S6.** Sequence alignment of *Arabidopsis* CrRLK1L subfamily receptor kinases.

822 **Figure S7.** Hormonal effects on primary root length, total lateral root number, fresh

823 weight and total leaf number in permissive and non-permissive temperature conditions.

824 **Movie S1.** Time-lapse imaging of growing root hairs of wild-type and *lil2* mutant in

825 permissive and non-permissive temperatures

826 **Movie S2.** Dynamics of EYFP fused FERONIA protein localization in growing root

827 hairs.

828 **Movies S3 and S4.** FER(WT)-EYFP and FER(G41S)-EYFP protein localization in

829 growing primary roots in permissive and non-permissive temperature conditions.

830 **Table S1. List of primers used in this study.**

831

832

## Parsed Citations

**Bell CJ, Ecker JR (1994) Assignment of 30 microsatellite loci to the linkage map of Arabidopsis. Genomics 19: 137-144**

Pubmed: [Author and Title](#)

Google Scholar: [Author Only](#) [Title Only](#) [Author and Title](#)

**Boisson-Dernier A, Roy S, Kritsas K, Grobei MA, Jaciubek M, Schroeder JI, Grossniklaus U (2009) Disruption of the pollen-expressed FERONIA homologs ANXUR1 and ANXUR2 triggers pollen tube discharge. Development 136: 3279-3288**

Pubmed: [Author and Title](#)

Google Scholar: [Author Only](#) [Title Only](#) [Author and Title](#)

**Carol RJ, Dolan L (2006) The role of reactive oxygen species in cell growth: lessons from root hairs. J Exp Bot 57: 1829-1834**

Pubmed: [Author and Title](#)

Google Scholar: [Author Only](#) [Title Only](#) [Author and Title](#)

**Chen J, Yu F, Liu Y, Du C, Li X, Zhu S, Wang X, Lan W, Rodriguez PL, Liu X, Li D, Chen L, Luan S (2016) FERONIA interacts with ABI2-type phosphatases to facilitate signaling cross-talk between abscisic acid and RALF peptide in Arabidopsis. Proc Natl Acad Sci U S A 113: E5519-5527**

Pubmed: [Author and Title](#)

Google Scholar: [Author Only](#) [Title Only](#) [Author and Title](#)

**Cheung AY, Wu HM (2011) THESEUS 1, FERONIA and relatives: a family of cell wall-sensing receptor kinases? Curr Opin Plant Biol 14: 632-641**

Pubmed: [Author and Title](#)

Google Scholar: [Author Only](#) [Title Only](#) [Author and Title](#)

**Cho HT, Cosgrove DJ (2002) Regulation of root hair initiation and expansin gene expression in Arabidopsis. Plant Cell 14: 3237-3253**

Pubmed: [Author and Title](#)

Google Scholar: [Author Only](#) [Title Only](#) [Author and Title](#)

**Clough SJ, Bent AF (1998) Floral dip: a simplified method for Agrobacterium-mediated transformation of Arabidopsis thaliana. Plant J 16: 735-743**

Pubmed: [Author and Title](#)

Google Scholar: [Author Only](#) [Title Only](#) [Author and Title](#)

**Cole RA, Fowler JE (2006) Polarized growth: maintaining focus on the tip. Curr Opin Plant Biol 9: 579-588**

Pubmed: [Author and Title](#)

Google Scholar: [Author Only](#) [Title Only](#) [Author and Title](#)

**DeBolt S, Gutierrez R, Ehrhardt DW, Somerville C (2007) Nonmotile cellulose synthase subunits repeatedly accumulate within localized regions at the plasma membrane in Arabidopsis hypocotyl cells following 2,6-dichlorobenzonitrile treatment. Plant Physiol 145: 334-338**

Pubmed: [Author and Title](#)

Google Scholar: [Author Only](#) [Title Only](#) [Author and Title](#)

**Deslauriers SD, Larsen PB (2010) FERONIA is a key modulator of brassinosteroid and ethylene responsiveness in Arabidopsis hypocotyls. Mol Plant 3: 626-640**

Pubmed: [Author and Title](#)

Google Scholar: [Author Only](#) [Title Only](#) [Author and Title](#)

**Du S, Qu LJ, Xiao J (2018) Crystal structures of the extracellular domains of the CrRLK1L receptor-like kinases ANXUR1 and ANXUR2. Protein Sci 27: 886-892**

Pubmed: [Author and Title](#)

Google Scholar: [Author Only](#) [Title Only](#) [Author and Title](#)

**Duan Q, Kita D, Johnson EA, Aggarwal M, Gates L, Wu HM, Cheung AY (2014) Reactive oxygen species mediate pollen tube rupture to release sperm for fertilization in Arabidopsis. Nat Commun 5: 3129**

Pubmed: [Author and Title](#)

Google Scholar: [Author Only](#) [Title Only](#) [Author and Title](#)

**Duan Q, Kita D, Li C, Cheung AY, Wu HM (2010) FERONIA receptor-like kinase regulates RHO GTPase signaling of root hair development. Proc Natl Acad Sci U S A 107: 17821-17826**

Pubmed: [Author and Title](#)

Google Scholar: [Author Only](#) [Title Only](#) [Author and Title](#)

**Duan Q, Liu MJ, Kita D, Jordan SS, Yeh FJ, Yvon R, Carpenter H, Federico AN, Garcia-Valencia LE, Eyles SJ, Wang CS, Wu HM, Cheung AY (2020) FERONIA controls pectin- and nitric oxide-mediated male-female interaction. Nature 579: 561-566**

Pubmed: [Author and Title](#)

Google Scholar: [Author Only](#) [Title Only](#) [Author and Title](#)

**Escobar-Restrepo JM, Huck N, Kessler S, Gagliardini V, Gheyselinck J, Yang WC, Grossniklaus U (2007) The FERONIA receptor-like kinase mediates male-female interactions during pollen tube reception. Science 317: 656-660**

Pubmed: [Author and Title](#)

Google Scholar: [Author Only](#) [Title Only](#) [Author and Title](#)

**Feng W, Kita D, Peaucelle A, Cartwright HN, Doan V, Duan Q, Liu MC, Maman J, Steinhorst L, Schmitz-Thom I, Yvon R, Kudla J, Wu HM, Cheung AY, Dinneny JR (2018) The FERONIA Receptor Kinase Maintains Cell-Wall Integrity during Salt Stress through Ca(2+) Signaling. *Curr Biol* 28: 666-675 e665**

Pubmed: [Author and Title](#)

Google Scholar: [Author Only](#) [Title Only](#) [Author and Title](#)

**Feng Y, Press B, Wandinger-Ness A (1995) Rab 7: an important regulator of late endocytic membrane traffic. *J Cell Biol* 131: 1435-1452**

Pubmed: [Author and Title](#)

Google Scholar: [Author Only](#) [Title Only](#) [Author and Title](#)

**Foreman J, Demidchik V, Bothwell JHF, Mylona P, Miedema H, Torres MA, Linstead P, Costa S, Brownlee C, Jones JDG, Davies JM, Dolan L (2003) Reactive oxygen species produced by NADPH oxidase regulate plant cell growth. *Nature* 422: 442-446**

Pubmed: [Author and Title](#)

Google Scholar: [Author Only](#) [Title Only](#) [Author and Title](#)

**Ge Z, Bergonci T, Zhao Y, Zou Y, Du S, Liu MC, Luo X, Ruan H, Garcia-Valencia LE, Zhong S, Hou S, Huang Q, Lai L, Moura DS, Gu H, Dong J, Wu HM, Dresselhaus T, Xiao J, Cheung AY, Qu LJ (2017) Arabidopsis pollen tube integrity and sperm release are regulated by RALF-mediated signaling. *Science* 358: 1596-1600**

Pubmed: [Author and Title](#)

Google Scholar: [Author Only](#) [Title Only](#) [Author and Title](#)

**Gilroy S, Jones DL (2000) Through form to function: root hair development and nutrient uptake. *Trends Plant Sci* 5: 56-60**

Pubmed: [Author and Title](#)

Google Scholar: [Author Only](#) [Title Only](#) [Author and Title](#)

**Gonneau M, Desprez T, Martin M, Doblaz VG, Bacete L, Miart F, Sormani R, Hematy K, Renou J, Landrein B, Murphy E, Van De Cotte B, Vernhettes S, De Smet I, Hofte H (2018) Receptor Kinase THESEUS1 Is a Rapid Alkalinization Factor 34 Receptor in Arabidopsis. *Curr Biol* 28: 2452-2458 e2454**

Pubmed: [Author and Title](#)

Google Scholar: [Author Only](#) [Title Only](#) [Author and Title](#)

**Greeff C, Roux M, Mundy J, Petersen M (2012) Receptor-like kinase complexes in plant innate immunity. *Front Plant Sci* 3: 209**

Pubmed: [Author and Title](#)

Google Scholar: [Author Only](#) [Title Only](#) [Author and Title](#)

**Guo H, Li L, Ye H, Yu X, Algreen A, Yin Y (2009) Three related receptor-like kinases are required for optimal cell elongation in Arabidopsis thaliana. *Proc Natl Acad Sci U S A* 106: 7648-7653**

Pubmed: [Author and Title](#)

Google Scholar: [Author Only](#) [Title Only](#) [Author and Title](#)

**Haruta M, Sabat G, Stecker K, Minkoff BB, Sussman MR (2014) A peptide hormone and its receptor protein kinase regulate plant cell expansion. *Science* 343: 408-411**

Pubmed: [Author and Title](#)

Google Scholar: [Author Only](#) [Title Only](#) [Author and Title](#)

**Hematy K, Hofte H (2008) Novel receptor kinases involved in growth regulation. *Curr Opin Plant Biol* 11: 321-328**

Pubmed: [Author and Title](#)

Google Scholar: [Author Only](#) [Title Only](#) [Author and Title](#)

**Hematy K, Sado PE, Van Tuinen A, Rochange S, Desnos T, Balzergue S, Pelletier S, Renou JP, Hofte H (2007) A receptor-like kinase mediates the response of Arabidopsis cells to the inhibition of cellulose synthesis. *Curr Biol* 17: 922-931**

Pubmed: [Author and Title](#)

Google Scholar: [Author Only](#) [Title Only](#) [Author and Title](#)

**Hepler PK, Vidali L, Cheung AY (2001) Polarized cell growth in higher plants. *Annu Rev Cell Dev Biol* 17: 159-187**

Pubmed: [Author and Title](#)

Google Scholar: [Author Only](#) [Title Only](#) [Author and Title](#)

**Huang GQ, Li E, Ge FR, Li S, Wang Q, Zhang CQ, Zhang Y (2013) Arabidopsis RopGEF4 and RopGEF10 are important for FERONIA-mediated developmental but not environmental regulation of root hair growth. *New Phytol* 200: 1089-1101**

Pubmed: [Author and Title](#)

Google Scholar: [Author Only](#) [Title Only](#) [Author and Title](#)

**Huck N, Moore JM, Federer M, Grossniklaus U (2003) The Arabidopsis mutant feronia disrupts the female gametophytic control of pollen tube reception. *Development* 130: 2149-2159**

Pubmed: [Author and Title](#)

Google Scholar: [Author Only](#) [Title Only](#) [Author and Title](#)

**John W Towns TC, Maytal Dahan, Ian Foster, Kelly Gaither, Andrew Grimshaw, Victor Hazlewood, Scott Lathrop, Dave Lifka, Gregory D. Peterson, Ralph Roskies, J. Ray Scott, Nancy Wilkens-Diehr (2014) XSEDE: Accelerating scientific discovery. *Computing in Science and Engineering* 16: 62-74**

Pubmed: [Author and Title](#)

Google Scholar: [Author Only](#) [Title Only](#) [Author and Title](#)

**Jones MA, Shen JJ, Fu Y, Li H, Yang Z, Grierson CS (2002) The Arabidopsis Rop2 GTPase is a positive regulator of both root hair initiation and tip growth. Plant Cell 14: 763-776**

Pubmed: [Author and Title](#)

Google Scholar: [Author Only Title Only Author and Title](#)

**Lehti-Shiu MD, Zou C, Hanada K, Shiu SH (2009) Evolutionary history and stress regulation of plant receptor-like kinase/pelle genes. Plant Physiol 150: 12-26**

Pubmed: [Author and Title](#)

Google Scholar: [Author Only Title Only Author and Title](#)

**Li C, Wu HM, Cheung AY (2016) FERONIA and Her Pals: Functions and Mechanisms. Plant Physiol 171: 2379-2392**

Pubmed: [Author and Title](#)

Google Scholar: [Author Only Title Only Author and Title](#)

**Lindner H, Muller LM, Boisson-Dernier A, Grossniklaus U (2012) CrRLK1L receptor-like kinases: not just another brick in the wall. Curr Opin Plant Biol 15: 659-669**

Pubmed: [Author and Title](#)

Google Scholar: [Author Only Title Only Author and Title](#)

**Miyazaki S, Murata T, Sakurai-Ozato N, Kubo M, Demura T, Fukuda H, Hasebe M (2009) ANXUR1 and 2, sister genes to FERONIA/SIRENE, are male factors for coordinated fertilization. Curr Biol 19: 1327-1331**

Pubmed: [Author and Title](#)

Google Scholar: [Author Only Title Only Author and Title](#)

**Molendijk AJ, Bischoff F, Rajendrakumar CS, Friml J, Braun M, Gilroy S, Palme K (2001) Arabidopsis thaliana Rop GTPases are localized to tips of root hairs and control polar growth. Embo J 20: 2779-2788**

Pubmed: [Author and Title](#)

Google Scholar: [Author Only Title Only Author and Title](#)

**Morillo SA, Tax FE (2006) Functional analysis of receptor-like kinases in monocots and dicots. Curr Opin Plant Biol 9: 460-469**

Pubmed: [Author and Title](#)

Google Scholar: [Author Only Title Only Author and Title](#)

**Muller LN, Muhle-Goll C, Biskup MB (2010) The Glc2Man2-fragment of the N-glycan precursor--a novel ligand for the glycan-binding protein malectin? Org Biomol Chem 8: 3294-3299**

Pubmed: [Author and Title](#)

Google Scholar: [Author Only Title Only Author and Title](#)

**Ngo QA, Vogler H, Lituiev DS, Nestorova A, Grossniklaus U (2014) A calcium dialog mediated by the FERONIA signal transduction pathway controls plant sperm delivery. Dev Cell 29: 491-500**

Pubmed: [Author and Title](#)

Google Scholar: [Author Only Title Only Author and Title](#)

**Nielsen E (2008) Plant Cell Wall Biogenesis During Tip Growth in Root Hair Cells. In Plant Cell Monographs, Vol 12. Springer-Verlag, Berlin Heidelberg, pp 85-102**

Pubmed: [Author and Title](#)

Google Scholar: [Author Only Title Only Author and Title](#)

**Pearce G, Moura DS, Stratmann J, Ryan CA, Jr. (2001) RALF, a 5-kDa ubiquitous polypeptide in plants, arrests root growth and development. Proc Natl Acad Sci U S A 98: 12843-12847**

Pubmed: [Author and Title](#)

Google Scholar: [Author Only Title Only Author and Title](#)

**Preuss ML, Santos-Serna J, Falbel TG, Bednarek SY, Nielsen E (2004) The Arabidopsis Rab GTPase RabA4b Localizes to the Tips of Growing Root Hair Cells. Plant Cell 16: 1589-1603**

Pubmed: [Author and Title](#)

Google Scholar: [Author Only Title Only Author and Title](#)

**Preuss ML, Schmitz AJ, Thole JM, Bonner HK, Otegui MS, Nielsen E (2006) A role for the RabA4b effector protein PI-4Kbeta1 in polarized expansion of root hair cells in Arabidopsis thaliana. J Cell Biol 172: 991-998**

Pubmed: [Author and Title](#)

Google Scholar: [Author Only Title Only Author and Title](#)

**Rotman N, Rozier F, Boavida L, Dumas C, Berger F, Faure JE (2003) Female control of male gamete delivery during fertilization in Arabidopsis thaliana. Curr Biol 13: 432-436**

Pubmed: [Author and Title](#)

Google Scholar: [Author Only Title Only Author and Title](#)

**Schallus T, Jaechk C, Feher K, Palma AS, Liu Y, Simpson JC, Mackeen M, Stier G, Gibson TJ, Feizi T, Pieler T, Muhle-Goll C (2008) Malectin: a novel carbohydrate-binding protein of the endoplasmic reticulum and a candidate player in the early steps of protein N-glycosylation. Mol Biol Cell 19: 3404-3414**

Pubmed: [Author and Title](#)

Google Scholar: [Author Only Title Only Author and Title](#)

**Schindelin J, Arganda-Carreras I, Frise E, Kaynig V, Longair M, Pietzsch T, Preibisch S, Rueden C, Saalfeld S, Schmid B, Tinevez JY,**

**White DJ, Hartenstein V, Eliceiri K, Tomancak P, Cardona A (2012) Fiji: an open-source platform for biological-image analysis. Nat Methods 9: 676-682**

Pubmed: [Author and Title](#)

Google Scholar: [Author Only](#) [Title Only](#) [Author and Title](#)

**Schulze-Muth P, Irmier S, Schroder G, Schroder J (1996) Novel type of receptor-like protein kinase from a higher plant (Catharanthus roseus). cDNA, gene, intramolecular autophosphorylation, and identification of a threonine important for auto- and substrate phosphorylation. J Biol Chem 271: 26684-26689**

Pubmed: [Author and Title](#)

Google Scholar: [Author Only](#) [Title Only](#) [Author and Title](#)

**Shih HW, Miller ND, Dai C, Spalding EP, Monshausen GB (2014) The receptor-like kinase FERONIA is required for mechanical signal transduction in Arabidopsis seedlings. Curr Biol 24: 1887-1892**

Pubmed: [Author and Title](#)

Google Scholar: [Author Only](#) [Title Only](#) [Author and Title](#)

**Shiu SH, Bleecker AB (2001) Plant receptor-like kinase gene family: diversity, function, and signaling. Sci STKE 2001: re22**

Pubmed: [Author and Title](#)

Google Scholar: [Author Only](#) [Title Only](#) [Author and Title](#)

**Shiu SH, Bleecker AB (2003) Expansion of the receptor-like kinase/Pelle gene family and receptor-like proteins in Arabidopsis. Plant Physiol 132: 530-543**

Pubmed: [Author and Title](#)

Google Scholar: [Author Only](#) [Title Only](#) [Author and Title](#)

**Smith IF, Hitt B, Green KN, Oddo S, LaFerla FM (2005) Enhanced caffeine-induced Ca<sup>2+</sup> release in the 3xTg-AD mouse model of Alzheimer's disease. J Neurochem 94: 1711-1718**

Pubmed: [Author and Title](#)

Google Scholar: [Author Only](#) [Title Only](#) [Author and Title](#)

**Stegmann M, Monaghan J, Smakowska-Luzan E, Rovenich H, Lehner A, Holton N, Belkhadir Y, Zipfel C (2017) The receptor kinase FER is a RALF-regulated scaffold controlling plant immune signaling. Science 355: 287-289**

Pubmed: [Author and Title](#)

Google Scholar: [Author Only](#) [Title Only](#) [Author and Title](#)

**Thole JM, Vermeer JE, Zhang Y, Gadella TW, Jr., Nielsen E (2008) Root hair defective4 encodes a phosphatidylinositol-4-phosphate phosphatase required for proper root hair development in Arabidopsis thaliana. Plant Cell 20: 381-395**

Pubmed: [Author and Title](#)

Google Scholar: [Author Only](#) [Title Only](#) [Author and Title](#)

**Weigel D, Glazebrook J (2006) EMS Mutagenesis of Arabidopsis Seed. CSH Protoc 2006**

Pubmed: [Author and Title](#)

Google Scholar: [Author Only](#) [Title Only](#) [Author and Title](#)

**Xiao Y, Stegmann M, Han Z, DeFalco TA, Parys K, Xu L, Belkhadir Y, Zipfel C, Chai J (2019) Mechanisms of RALF peptide perception by a heterotypic receptor complex. Nature 572: 270-274**

Pubmed: [Author and Title](#)

Google Scholar: [Author Only](#) [Title Only](#) [Author and Title](#)

**Yu F, Li J, Huang Y, Liu L, Li D, Chen L, Luan S (2014) FERONIA receptor kinase controls seed size in Arabidopsis thaliana. Mol Plant 7: 920-922**

Pubmed: [Author and Title](#)

Google Scholar: [Author Only](#) [Title Only](#) [Author and Title](#)

**Yu F, Qian L, Nibau C, Duan Q, Kita D, Levasseur K, Li X, Lu C, Li H, Hou C, Li L, Buchanan BB, Chen L, Cheung AY, Li D, Luan S (2012) FERONIA receptor kinase pathway suppresses abscisic acid signaling in Arabidopsis by activating ABI2 phosphatase. Proc Natl Acad Sci U S A 109: 14693-14698**

Pubmed: [Author and Title](#)

Google Scholar: [Author Only](#) [Title Only](#) [Author and Title](#)
